# Supplementary material for: Efficacy and Safety of Dapagliflozin in Patients With Inadequately Controlled Type 1 Diabetes: The DEPICT-1 52-Week Study
Source: Oxford University Press journal article supplement (doi:10.2337/dc18-1087), 2018-10-23
Supplement: dc181087supplementarydata.pdf [file dc181087supplementarydata.pdf]

**DIABETIC KETOACIDOSIS (DKA)  
ADJUDICATION COMMITTEE CHARTER**

**DAPAGLIFLOZIN**

**BMS-512148**

**TYPE 1 DIABETES**

Date:

Version: 2.0

This document is a confidential communication. Acceptance of this document constitutes an agreement by the recipient that no unpublished information contained herein will be published or disclosed without the sponsors' prior written approval.

**DOCUMENT HISTORY**

| <b>Version</b> | <b>Date of Issue</b> | <b>Summary of Change</b>                                                                                                                                                                                                                                                                                                                                                                             |
|----------------|----------------------|------------------------------------------------------------------------------------------------------------------------------------------------------------------------------------------------------------------------------------------------------------------------------------------------------------------------------------------------------------------------------------------------------|
| 2.0            |                      | <p>Revised version</p> <ul style="list-style-type: none"><li>• Updated Studies in Scope</li><li>• Preferred terms (MedDRA v19.1) added.</li><li>• Added updated adjudication forms</li><li>• Allowance of final review outside of committee meeting for cases were all are in agreement with the exception of definite cases</li><li>• administrative and verbiage changes in all sections</li></ul> |
| 1.0            |                      | Initial version                                                                                                                                                                                                                                                                                                                                                                                      |

## CHARTER APPROVAL PAGE

|                                                             |      |
|-------------------------------------------------------------|------|
| <b>Diabetic Ketoacidosis Adjudication Committee (DKAAC)</b> |      |
| , MD, DKAAC Chairman                                        |      |
| Signature                                                   | Date |
| <b>AstraZeneca (AZ)</b>                                     |      |
| , MD Type 1 Medical Lead                                    |      |
| Signature                                                   | Date |
| <b>Bristol-Myers Squibb (BMS)</b>                           |      |
| , MD, PhD, Type 1 Medical Lead                              |      |
| Signature                                                   | Date |

**TABLE OF CONTENTS**

|                                                                      |    |
|----------------------------------------------------------------------|----|
| ODIABETIC KETOACIDOSIS (DKA) ADJUDICATION COMMITTEE CHARTER.....     | 1  |
| DOCUMENT HISTORY .....                                               | 2  |
| TABLE OF CONTENTS.....                                               | 4  |
| LIST OF TABLES .....                                                 | 5  |
| LIST OF FIGURES .....                                                | 5  |
| 1 PURPOSE.....                                                       | 6  |
| 2 PURPOSE OF THE DKA ADJUDICATION COMMITTEE .....                    | 6  |
| 3 MEMBERSHIP .....                                                   | 6  |
| 3.1 Conditions of Membership .....                                   | 6  |
| 3.2 Duration and Structure of Membership .....                       | 7  |
| 3.3 Preparation and Training .....                                   | 7  |
| 3.4 Committee Members .....                                          | 7  |
| 3.5 Roles and Responsibilities.....                                  | 8  |
| 3.5.1 <i>DKAAC Members</i> .....                                     | 8  |
| 3.5.2 <i>DKAAC Chair</i> .....                                       | 8  |
| 3.5.3 <i>Sponsor/Designee</i> .....                                  | 9  |
| 4 ADJUDICATION PROCESS .....                                         | 9  |
| 4.1 Identification of Cases .....                                    | 9  |
| 4.2 DKA-Related Documents.....                                       | 10 |
| 4.3 Case Review .....                                                | 13 |
| 4.3.1 <i>Individual Case Review</i> .....                            | 13 |
| 4.3.2 <i>Group Case Review</i> .....                                 | 13 |
| 4.3.3 <i>Maintaining Records of Meetings</i> .....                   | 14 |
| 4.4 Adjudicator Assessment .....                                     | 14 |
| 4.4.1 <i>Diagnostic Criteria for DKA</i> .....                       | 14 |
| 4.4.2 <i>Severity Criteria of DKA</i> .....                          | 14 |
| 4.5 Data Management and Archival .....                               | 15 |
| 4.6 Summary of Adjudication Activities and Associated Timelines..... | 15 |
| 5 COMMUNICATIONS AND SECURITY .....                                  | 16 |
| 6 BMS/AZ/DESIGINEE CONTACTS.....                                     | 16 |
| 7 ADDENDA AND REVISIONS TO THE DKAAC CHARTER.....                    | 16 |
| 8 LIST OF APPENDICES.....                                            | 16 |

|            |                                                                                     |    |
|------------|-------------------------------------------------------------------------------------|----|
| 9          | REFERENCES .....                                                                    | 17 |
| APPENDIX 1 | AZ/BMS STUDIES IN SCOPE .....                                                       | 18 |
| APPENDIX 2 | BMS PREFERRED TERMS (PTS) FOR IDENTIFICATION OF<br>CASES BASED ON AE/SAE DATA ..... | 19 |

### LIST OF TABLES

|              |                                                   |    |
|--------------|---------------------------------------------------|----|
| Table 1-1:   | Contributors to Charter .....                     | 6  |
| Table 3.4-1: | Membership of the Committee .....                 | 7  |
| Table 4.6-1: | Adjudication Activities and Turnaround Time ..... | 15 |
| Table 6-1:   | BMS/AZ/Designee Contacts .....                    | 16 |

### LIST OF FIGURES

|                 |                                                |    |
|-----------------|------------------------------------------------|----|
| Figure 4.2-1:   | DIABETIC KETOACIDOSIS (DKA) ADJUDICATION ..... | 12 |
| Figure 4.4.2-1: | Severity Criteria of DKA .....                 | 14 |

## 1 PURPOSE

The Diabetic Ketoacidosis Adjudication Committee (DKAAC) reviews investigator-identified DKA cases in the Type 1 Diabetes (T1DM) dapagliflozin program (see [APPENDIX 1](#) for studies in scope) to confirm whether DKA has occurred according to criteria established in this charter. The DKAAC creates and maintains the DKAAC Charter along with the sponsor, and completes adjudication forms on which it summarizes its assessment. All potential DKA cases reported by Investigators will be adjudicated by the DKAAC.

This Charter describes the structure, roles, and responsibilities of the DKAAC as well as the process and criteria by which potential DKA cases are adjudicated.

**Table 1-1: Contributors to Charter**

| Name | Role           |
|------|----------------|
| , MD | DKAAC Chairman |
| , MD | DKAAC Member   |
| , MD | DKAAC Member   |

## 2 PURPOSE OF THE DKA ADJUDICATION COMMITTEE

The DKAAC provides independent assessment, by expert physicians blinded to assignments of study drug, of events in the dapagliflozin (T1DM) program (see [APPENDIX 1](#) for studies in scope). The DKAAC will review data from the clinical trials and adjudicate cases in a consistent, unbiased, and uniform manner. Individual adjudicator assessments as well as final group assessments will be recorded on dedicated adjudication forms.

The DKAAC will conduct all of its operations under International Conference on Harmonization (ICH) Good Clinical Practice (GCP) guidelines. **Adjudication will be performed in a blinded fashion:** DKAAC members will remain blinded to the treatment assignments throughout the entire study adjudication process.

## 3 MEMBERSHIP

All DKAAC members will be physicians with expertise relevant to adjudication of DKA cases.

### 3.1 Conditions of Membership

The DKAAC members must disclose all potential conflicts of interest, both financial and non-financial. These include but are not limited to: the ownership of any stock and presence of any consultancy arrangement with any pharmaceutical companies, biotech companies, or contract research organizations; serving as an investigator or co-investigator for the studies covered in this charter; holding any relevant patents. BMS and AZ will be responsible for deciding whether consultancies, financial interests, or non-financial interests of the members materially impact on their objectivity. No members of the DKAAC shall purchase or sell any shares of BMS or AZ stock during the course of the studies. Members of the DKAAC will be responsible for advising the sponsor or designee in writing of any changes in their financial

interests in pharmaceutical companies, biotech companies, or contract research organizations, including consultancies. Members of the DKAAC who develop potential or significant perceived conflicts of interest that materially impact on objectivity will need to resign.

Prior to functioning as a DKAAC member, a signed confidentiality agreement, a curriculum vitae, a disclosure form, and a signed financial agreement must be completed and submitted to the sponsor or designee electronic study files

### 3.2 Duration and Structure of Membership

DKAAC membership is expected to be for the duration of the studies in scope (see [APPENDIX 1](#)). The membership may also cover future trials within this clinical program. Membership in this DKAAC does not preclude membership in other committees that may be constituted in the future for other dapagliflozin studies. The DKAAC members will not be involved as investigators in the trials.

The DKAAC Chairman will document any additions and/or changes in DKAAC personnel. If a member resigns from the DKAAC, the Chair and Sponsor/Designee will choose a replacement in a timely fashion. In the interim, the remaining members will continue to function within the guidelines of the Charter.

### 3.3 Preparation and Training

The Sponsor/Designee will provide the following information to the DKAAC prior to the first submission of cases for review:

- Overview of the studies in scope
- Protocols for each study and any amendments that occur from there on after
- Explanation of the case package contents, and form utilization, including Reviewer's and Final (consensus) Adjudication forms
- Instructions for submission of adjudication forms and of requests for additional information
- Discussion of adjudication commitment and anticipated workload

The Sponsor/Designee will provide additional information as requested.

### 3.4 Committee Members

The committee members are listed in Table 3.4-1.

| <b>Table 3.4-1: Membership of the Committee</b> |                |                                                                      |
|-------------------------------------------------|----------------|----------------------------------------------------------------------|
| <b>Name</b>                                     | <b>Role</b>    | <b>Affiliation and Contact Information<br/>(Address/Phone/email)</b> |
| , MD,<br>F Med Sci                              | DKAAC<br>Chair |                                                                      |

| <b>Table 3.4-1: Membership of the Committee</b> |                 |                                                                      |
|-------------------------------------------------|-----------------|----------------------------------------------------------------------|
| <b>Name</b>                                     | <b>Role</b>     | <b>Affiliation and Contact Information<br/>(Address/Phone/email)</b> |
| , MD                                            | DKAAC<br>Member |                                                                      |
| , MD                                            | DKAAC<br>Member |                                                                      |

### 3.5 Roles and Responsibilities

#### 3.5.1 DKAAC Members

The DKAAC members will be responsible for the following:

- Advise in the development of DKAAC processes and documents.
- Review and adjudicate assigned cases within 2 weeks of receipt (timeframe will be determined based upon agreement with sponsors or designee, such as times of database locks or other set timelines)
- Participate in all meetings of the DKAAC.

#### 3.5.2 DKAAC Chair

The DKAAC Chair will have the following additional responsibilities:

- Conduct all DKAAC meetings
- Approve the final versions of the DKAAC Charter and associated documents
- Ensure overall quality control of the adjudication process
- Prepare meeting minutes
- Complete, sign and date the final (consensus) adjudication form for each case, within 5 business days (or agreed upon timeline with sponsor or designee) of group case review or receipt of individual forms when group case review is not required (see [section 4.3.2](#))



### 3.5.3 **Sponsor/Designee**

The Sponsor/Designee\* will:

- Identify and approve cases for adjudication based on criteria established in [APPENDIX 2](#). Criteria may include reassessment of a case if new data becomes available. Refer to section 4.1 for further details on identification of cases
- Compile adjudication packages based on available data and submit to the DKAAC for review when package is complete
- Review data in packages to ensure all queries are resolved and that all relevant information needed for adjudication is included if available
- Assist the DKAAC in obtaining additional information (if needed) about cases undergoing evaluation
- Set up all meetings for adjudication based upon number of cases, DMC ( data monitoring committee) meeting schedule, study lock schedules, and agreed upon timelines between committee members and sponsor/designee
- Ensure prompt and timely reviews of all DKA cases by committee members
- Ensure proper tracking, finalization, approval and distribution of all DKA documents
- Ensure proper communication on cases to all DKAAC members

\* - The Sponsor is AstraZeneca.

## 4 **ADJUDICATION PROCESS**

### 4.1 **Identification of Cases**

DKA is an expected event in clinical studies in subjects with type 1 diabetes. Subjects and their family members must be aware of the possibility that DKA may occur, the potential signs and symptoms, as well as the dangers associated with DKA. Investigators will identify potential events of DKA at each study visit. Furthermore, because dapagliflozin reduces plasma glucose in an insulin-independent manner, the marked elevation in blood glucose commonly observed with events of DKA may be attenuated. In order to enhance identification of potential DKA events when a subject experiences signs/symptoms consistent with DKA, additional steps to allow the subject to measure blood ketone levels are included in the studies.

Subjects will receive a combined glucose and ketone meter and will be trained in the procedure of conducting blood ketone testing according to the manufacturer's specifications. Subjects will be advised to measure their blood ketones using the glucose and ketone meter provided by the Sponsor/Designee when they have potential symptoms/signs of DKA, including but not limited to: excessive thirst, nausea and vomiting, frequent urination, weakness or fatigue, fever, fruity-scented breath, confusion, and/or consistently elevated blood glucose, and/or during acute illness. Subjects should contact the study site if their blood ketone reading is  $\geq 0.6$  mmol/l.

Symptoms potentially associated with DKA, blood ketone test results, and relevant risk factors (eg, missed insulin injection, insulin pump malfunction, infection, heart attack, etc) should be recorded in the subject diary. Investigators will identify and discuss potential DKA events with

subjects at each study visit. The blood ketone values should be reviewed by the site to identify any unusual high values, and to confirm that the values (from the glucose and ketone meter's memory and/or from the subject's diary) were obtained from the subject. If finger stick blood ketone and blood glucose values are discordant from glycemic control assessed by the central laboratory or with clinical symptoms, the subject's glucose and ketone meter should be tested and the procedure for using it reviewed with the subject.

When an Investigator identifies a potential DKA event, she/he will document all DKA related symptoms, relevant risk factors, and available laboratory test results (including blood ketone and blood glucose values measured by the ketone/glucose meter) on the DKA eCRF pages and report this event to the Sponsor/Designee. If an investigator decides to delete an event, the sponsor/designee is not obligated to send the event to the adjudication committee.

All of the potential DKA cases reported by Investigators will be sent to the DKAAC for adjudication (as per criteria below). In addition, the Sponsor/Designee will utilize Standardized MedDRA Queries (SMQs) based on a list of pre-defined terms in Medical Dictionary for Regulatory Activities (MedDRA) to identify potential DKA events. The lists of these terms are included in [APPENDIX 2](#). Investigators will further evaluate these cases when queried about these events and if an event is determined to be a potential DKA case, the investigator will complete the DKA eCRF. Any additional potential DKA cases identified by this process will also be sent for adjudication.

All potential DKA cases that occur during the lead-in and blinded treatment periods of studies, and in any subsequent follow-up periods (per protocol or in accordance with Investigator's reporting) will be submitted for adjudication. Cases occurring during the qualification period will NOT be sent for adjudication unless the abnormality persists and worsens during the lead-in or blinded treatment period(s).

An individual subject may have multiple potential DKA occurrences. Adjudication packages will be prepared and submitted to the DKAAC for each individual occurrence when all relevant information has been made available.

## 4.2 DKA-Related Documents

Adjudication packages will contain available information necessary for adjudication of identified cases. Adjudication packages will be provided by the Sponsor/Designee to the DKAAC and may include, but are not limited to:

- A case submission form and adjudication result forms (individual DKAAC member result forms and a consensus form for the DKAAC chair) - see [Figure 4.2-1](#)
- A DKA Adjudication Patient Profile, which will contain:
  - Demographic data (age, gender, race)
  - All concomitant medications
  - Medical history
  - Physical examination abnormalities
  - Subject status

- All AE/SAE data ( to include DKA), as applicable
- Safety narrative, when available.
- Study procedures, as applicable.
- Blinded study medication exposure ( if study is blinded)
- Lab results
- Copy of SAE associated documents, (eg, hospital/ER admission note, hospital discharge summary, operative and/or procedure notes, etc.) when applicable.
- Copy of other relevant documents (eg, physician progress notes, outpatient facility report, ER discharge summary, ambulance report, etc.), as applicable, or as deemed necessary either by sponsor, or DKAAC member.

**NOTE: The sponsor/designee will coordinate translation of source documents as required. All patient identifying information listed on the source will be redacted**

**The redaction may include but is not limited to the following:**

- **Subject's name**
- **Address**
- **Telephone numbers**
- **Medical Record numbers**
- **Family members names**
- **Insurance numbers**
- **Social Security numbers**
- **Date of birth**
- **Redaction of any additional information with regards to local data protection laws**

***Notes:***

- ***The DKAAC may request additional information regarding dapagliflozin studies at any time. The sponsor/ designee will provide such information within the scope of the outlined studies in this charter in a timely manner.***

**Figure 4.2-1: DIABETIC KETOACIDOSIS (DKA) ADJUDICATION**

7 ☐ INDIVIDUAL ADJUDICATION FORM

8 ☐ FINAL ADJUDICATION FORM

EVENT ONSET DATE

|   |   |   |   |   |  |
|---|---|---|---|---|--|
|   |   |   |   |   |  |
| D | D | M | Y | Y |  |

EVENT ONSET TIME

|   |   |   |   |
|---|---|---|---|
|   |   |   |   |
| H | H | M | M |

**ASSESSMENT OF DKA (MARK ONE):**

1 ☐ DEFINITE

4 ☐ POSSIBLE

5 ☐ UNLIKELY

**IF ASSESSED AS DEFINITE DKA, PLEASE INDICATE SEVERITY (MARK ONE):**

1 ☐ MILD

2 ☐ MODERATE

4 ☐ SEVERE

**IF ASSESSED AS DEFINITE DKA, PLEASE INDICATE PRIMARY CAUSE (MARK ONE):**

430 ☐ INSULIN PUMP FAILURE

421 ☐ MISSED INSULIN DOSE

431 ☐ SEVERE ILLNESS

432 ☐ NOT IDENTIFIED

98 ☐ OTHER (PLEASE SPECIFY):

|  |
|--|
|  |
|--|

**IF ASSESSED AS DEFINITE DKA, PLEASE INDICATE CONTRIBUTING FACTORS (SELECT ALL THAT APPLY):**

430 ☐ INSULIN PUMP FAILURE

421 ☐ MISSED INSULIN DOSE

431 ☐ SEVERE ILLNESS

432 ☐ NOT IDENTIFIED

98 ☐ OTHER (PLEASE SPECIFY):

|  |
|--|
|  |
|--|

ADJUDICATOR: 

|  |
|--|
|  |
|--|

 SIGNATURE: 

|  |
|--|
|  |
|--|

 DATE: 

|   |   |   |   |   |   |
|---|---|---|---|---|---|
|   |   |   |   |   |   |
| D | D | M | M | M | Y |

### 4.3 Case Review

#### 4.3.1 Individual Case Review

Upon receipt of adjudication packages (“cases”) which will be received by all members, each reviewer will independently evaluate the cases (as described in [Section 4.4](#)). If additional information is needed, the Sponsor/Designee should be contacted. Upon completion of the initial review, each DKAAC member will complete the *Individual Adjudication form*, scan and email the completed CRF to Sponsor/Designee for review and subsequent imaging and data entry. When adjudicating cases the DKAAC members will follow the diagnostic criteria/severity for DKA below as listed in [Section 4.4.1](#).

If new relevant information regarding a case becomes available after its adjudication is completed, the case can be sent to the reviewers for re-adjudication. Relevant information will be determined on case by case basis by sponsor or designee medical reviewer.

#### 4.3.2 Group Case Review

It is expected that any cases in which the DKAAC members are not in agreement on the Individual Adjudication forms will be discussed by the DKAAC during group case review meetings. The objective is to express the collective assessment of the DKAAC members who reviewed the case. The frequency of the group case review meetings will depend on case occurrence, but are expected to be held approximately every other month or agreed upon timelines, via teleconference. DKAAC meetings will involve the Chair and members of the DKAAC and may consist of open and closed sessions. No cases will be reviewed without at least 2 of the individual case reviewers present. If any member is unable to attend the adjudication meeting, a written summary of that member’s adjudication of cases is required.

- The open sessions may be attended by Sponsor/Designee representatives and will generally include issues related to the conduct of the studies.
- The closed session will be attended only by DKAAC members.

In preparation for group case review meetings, each DKAAC member will receive updated information, if applicable, regarding the individual cases to be reviewed. After group case review meetings, the DKAAC Chair will complete and submit to the Sponsor/Designee a *Final Adjudication form* for each case reviewed during the meeting including cases for which members did not conduct detailed discussion due to consensus being established by individual case reviews. When adjudicating cases the DKAAC members will follow the diagnostic criteria/severity for DKA below as listed in [Section 4.4.1](#).

In instances where all Individual Adjudication form responses concur for DKA cases that are assessed as “possibly” or “unlikely”, the Sponsor/Designee will send the individual forms to the DKAAC Chair for review. The DKAAC Chair can determine if further discussion is warranted or if the Final Adjudication form can be completed without further discussion. If any assessments on the individual forms are discrepant, the case should be discussed until a

consensus is reached. All DKA cases that are assessed as “Definite” will be discussed at the adjudication meeting.

### 4.3.3 **Maintaining Records of Meetings**

The DKAAC is responsible for preparing the minutes of all DKAAC meetings documenting communication amongst committee members pertaining to a particular DKA case. The DKAAC will forward the meeting minutes to the sponsor or designee who will maintain an official record of any agendas, minutes, attendance, communications with DKAA members and presentations.

## 4.4 **Adjudicator Assessment**

### 4.4.1 **Diagnostic Criteria for DKA**

The diagnosis of DKA must be based on robust biochemical data. It cannot solely be defined by the degree of ketonaemia or clinical signs and symptoms. It is defined by decompensated diabetes and evidence of ketoacidosis. When completing the adjudication forms, the DKAAC members will express their opinions regarding whether or not this case is a DKA based on the following criteria:

- 1) Acidosis
  - a) Venous pH <7.3
  - b) Serum bicarbonate  $\leq 18$  mEq/L

Well-documented DKA is a DKA event that meets the above criteria, plus one or more of the following signs/symptoms:

- Hyperventilation
- Dehydration
- Depressed consciousness/confusion

### 4.4.2 **Severity Criteria of DKA**

For each confirmed case, the DKAAC members will also express their opinions regarding the severity using the criteria<sup>1</sup> described below (Figure 4.4.2-1), if relevant data are available.

**Figure 4.4.2-1: Severity Criteria of DKA**

|                                               | Mild DKA | Moderate DKA | Severe DKA  |
|-----------------------------------------------|----------|--------------|-------------|
| pH                                            | < 7.3    | < 7.2        | < 7.1       |
| Serum bicarbonate (mEq/L)                     | 15 - 18  | 10 to < 15   | < 10        |
| Anion gap <sup>a</sup>                        | > 10     | > 12         | > 12        |
| Alteration in sensorial or mental obtundation | Alert    | Alert/drowsy | Stupor/coma |

<sup>a</sup> calculation  $(\text{Na}^+) - (\text{Cl}^- + \text{HCO}_3^-)$  (mEq/L)

## 4.5 Data Management and Archival

Upon receipt of completed result adjudication CRFs from the DKAAC members, both individual and consensus, the sponsor or designee will review the forms for completeness. Data clarification emails will be sent to the DKAAC members for any missing, incomplete or contradictory data reported on the CRFs. Any corrections made to the original form should be initialed and dated by the adjudicator before resubmitting to sponsor or designee.

The Sponsor/designee will not perform assessments of completed adjudication CRF's against case data and definitions in this Charter. It is the responsibility of the DKAAC to ensure that cases are reviewed and assessed in accordance with the definitions provided in this Charter.

Upon receipt of the completed individual and consensus result adjudication CRFs and review by the sponsor or designee, the adjudication CRFs will be imaged and entered into the relevant study and imaging databases in accordance with established data entry processes. All individual and consensus result adjudication CRFs will be entered into the study database with the exception of comments entered by the adjudicators that are not inclusive of the CRF data point collection. (eg, comments entered on the side of the CRF). These comments will remain available via review of the original forms but will not be part of the electronic database.

## 4.6 Summary of Adjudication Activities and Associated Timelines

Table 4.6-1 summarizes the adjudication-related activities, responsible party and associated turnaround time.

| <b>Table 4.6-1: Adjudication Activities and Turnaround Time</b>                                         |                          |                                                                                                                                                        |
|---------------------------------------------------------------------------------------------------------|--------------------------|--------------------------------------------------------------------------------------------------------------------------------------------------------|
| <b>Activity</b>                                                                                         | <b>Responsible Party</b> | <b>Turn Around Time</b>                                                                                                                                |
| Identify Cases for Adjudication                                                                         | Sponsor/<br>Designee     | Ongoing                                                                                                                                                |
| Compile and Send Adjudication Packages                                                                  | Sponsor/<br>Designee     | Cases will be sent on an ongoing basis according to agreed upon timelines between sponsors, designees and DKAAC members                                |
| Ongoing Individual Review of Cases and Completion/<br>Submission of <i>Individual Adjudication</i> Form | DKAAC<br>members         | Within 2 weeks of receipt of adjudication packages or as agreed upon between sponsors, designee and DKAAC members                                      |
| Query for additional information, when applicable                                                       | DKAAC<br>members         | Within 2 weeks of receipt of adjudication packages or as agreed upon between sponsors, designee and DKAAC members                                      |
| Periodic group case review/Consensus meetings                                                           | DKAAC<br>members         | Every other month and/or other requirement                                                                                                             |
| Completion/Submission of Final Adjudication Form                                                        | DKAAC Chair              | Within 5 business days of group case review/or receipt of individual forms when group case review is not required (see <a href="#">section 4.3.2</a> ) |

**5 COMMUNICATIONS AND SECURITY**

Adjudication packages and all documents that are relevant to the adjudication process will be maintained in a secure manner with password protection. Adjudication packages will be accessible or provided to DKAAC members, sponsor or designee in a secure manner. The DKAAC members will be responsible for maintaining confidentiality of all information supplied to them by the Sponsor/Designee, including data and reports, contents of discussions, notes, and minutes of meetings. Although the DKAAC Chair should be kept aware of the potential need to share the minutes in response to a Health Authority request, any and all external communications concerning the dapagliflozin program will be made only by the Sponsor/Designee.

**6 BMS/AZ/DESIGINEE CONTACTS**

| <b>Table 6-1: BMS/AZ/Designee Contacts</b> |                                                                     |                                            |
|--------------------------------------------|---------------------------------------------------------------------|--------------------------------------------|
| <b>Name</b>                                | <b>Role</b>                                                         | <b>Affiliation and Contact Information</b> |
| , MD, PhD                                  | Type 1 Medical Lead,<br>MB102-229,<br>MB 102-230<br>Medical Monitor | Bristol Myers Squibb                       |
|                                            | Associate Director,<br>Clinical Development                         | Astra-Zeneca                               |
|                                            | Study leader<br>AZ protocol<br>D1695C00001                          | Astra-Zeneca                               |
| , MD                                       | Type 1 medical lead for<br>MB 102-230 as of<br>January 2, 2017      | Astra-Zeneca                               |
| ,                                          | Associate Director<br>Pharmacovigilance and<br>Safety Services      | ICON                                       |

**7 ADDENDA AND REVISIONS TO THE DKAAC CHARTER**

Any subsequent changes or additions to this DKAAC charter will be made after consultation with the DKAAC members and the Sponsor/Designee. Subsequent versions will be clearly identified with the date of approval and a version number on the cover page.

**8 LIST OF APPENDICES**

- 1) AZ/BMS Studies in scope
- 2) Preferred Terms for identification of cases based on AEs/SAEs data



**9 REFERENCES**

- <sup>1</sup> Kitabchi AE, Umpierrez GE, Miles JM, Fisher JN. Hyperglycemic crises in adult patients with diabetes. *Diabetes Care*. 2009 Jul;32(7):1335-43. doi: 10.2337/dc09-9032.

**APPENDIX 1      AZ/BMS STUDIES IN SCOPE**

| <b>Study Number</b> | <b>Title</b>                                                                                                                                                                                                                                            |
|---------------------|---------------------------------------------------------------------------------------------------------------------------------------------------------------------------------------------------------------------------------------------------------|
| MB102-229           | A Multicenter, Randomized, Double-Blind, Placebo-controlled, Parallel Group, Phase 3 Study to Evaluate the Efficacy and Safety of Dapagliflozin as an Add-on to Insulin Therapy in Subjects with Type 1 Diabetes Mellitus                               |
| MB102-230           | A Multicenter, Randomized, Double-Blind, Placebo-controlled, Parallel Group, Phase 3 Study to Evaluate the Efficacy and Safety of Dapagliflozin as an Add-on to Insulin Therapy in Subjects with Type 1 Diabetes Mellitus                               |
| D1695C00001         | A clinical pharmacology and long term study to evaluate the safety, efficacy, pharmacokinetics and pharmacodynamics of dapagliflozin therapy in combination with insulin in Japanese subjects with type 1 diabetes who have inadequate glycemic control |
| D1695C00003         | TBD                                                                                                                                                                                                                                                     |
| D1695C00004         | TBD                                                                                                                                                                                                                                                     |

Note: Any future studies that are in-scope will be confirmed by AZ/BMS

**APPENDIX 2      BMS PREFERRED TERMS (PTS) FOR IDENTIFICATION OF CASES BASED ON AE/SAE DATA**

| <b>BMS Custom SMQ Name</b> | <b>BMS Custom SMQ Code</b> | <b>MedDRA Preferred Term</b>     | <b>MedDRA Preferred Code</b> | <b>Current MedDRA Version Term</b> |
|----------------------------|----------------------------|----------------------------------|------------------------------|------------------------------------|
| <b>SSC_NAME</b>            | <b>SSC_CODE</b>            | <b>PT_NAME</b>                   | <b>PT_CODE</b>               | <b>VERSION_TERM</b>                |
| [19.0] MB102 Potential DKA | BMS02961                   | ABDOMINAL DISCOMFORT             | 10000059                     | MedDRA Version 19.0                |
| [19.0] MB102 Potential DKA | BMS02961                   | ABDOMINAL PAIN                   | 10000081                     | MedDRA Version 19.0                |
| [19.0] MB102 Potential DKA | BMS02961                   | ABDOMINAL PAIN LOWER             | 10000084                     | MedDRA Version 19.0                |
| [19.0] MB102 Potential DKA | BMS02961                   | ABDOMINAL PAIN UPPER             | 10000087                     | MedDRA Version 19.0                |
| [19.0] MB102 Potential DKA | BMS02961                   | ABDOMINAL RIGIDITY               | 10000090                     | MedDRA Version 19.0                |
| [19.0] MB102 Potential DKA | BMS02961                   | ABDOMINAL TENDERNESS             | 10000097                     | MedDRA Version 19.0                |
| [19.0] MB102 Potential DKA | BMS02961                   | ACETONAEMIA                      | 10000410                     | MedDRA Version 19.0                |
| [19.0] MB102 Potential DKA | BMS02961                   | ACID BASE BALANCE                | 10000456                     | MedDRA Version 19.0                |
| [19.0] MB102 Potential DKA | BMS02961                   | ACID BASE BALANCE ABNORMAL       | 10000457                     | MedDRA Version 19.0                |
| [19.0] MB102 Potential DKA | BMS02961                   | ACID-BASE BALANCE DISORDER MIXED | 10000483                     | MedDRA Version 19.0                |
| [19.0] MB102 Potential DKA | BMS02961                   | ACIDOSIS                         | 10000486                     | MedDRA Version 19.0                |
| [19.0] MB102 Potential DKA | BMS02961                   | ACIDOSIS HYPERCHLORAEMIC         | 10000489                     | MedDRA Version 19.0                |
| [19.0] MB102 Potential DKA | BMS02961                   | ACUTE ABDOMEN                    | 10000647                     | MedDRA Version 19.0                |
| [19.0] MB102 Potential DKA | BMS02961                   | ALTERED STATE OF CONSCIOUSNESS   | 10001854                     | MedDRA Version 19.0                |

# SUPPLEMENTARY DATA

Dapagliflozin  
BMS-512148

DKA Adjudication  
Committee Charter

| <b>BMS Custom SMQ Name</b> | <b>BMS Custom SMQ Code</b> | <b>MedDRA Preferred Term</b> | <b>MedDRA Preferred Code</b> | <b>Current MedDRA Version Term</b> |
|----------------------------|----------------------------|------------------------------|------------------------------|------------------------------------|
| <b>SSC_NAME</b>            | <b>SSC_CODE</b>            | <b>PT_NAME</b>               | <b>PT_CODE</b>               | <b>VERSION_TERM</b>                |
| [19.0] MB102 Potential DKA | BMS02961                   | ANION GAP                    | 10002522                     | MedDRA Version 19.0                |
| [19.0] MB102 Potential DKA | BMS02961                   | ANION GAP ABNORMAL           | 10002523                     | MedDRA Version 19.0                |
| [19.0] MB102 Potential DKA | BMS02961                   | ANION GAP DECREASED          | 10002526                     | MedDRA Version 19.0                |
| [19.0] MB102 Potential DKA | BMS02961                   | ANION GAP INCREASED          | 10002528                     | MedDRA Version 19.0                |
| [19.0] MB102 Potential DKA | BMS02961                   | APALLIC SYNDROME             | 10002941                     | MedDRA Version 19.0                |
| [19.0] MB102 Potential DKA | BMS02961                   | BLOOD BICARBONATE            | 10005357                     | MedDRA Version 19.0                |
| [19.0] MB102 Potential DKA | BMS02961                   | BLOOD BICARBONATE ABNORMAL   | 10005358                     | MedDRA Version 19.0                |
| [19.0] MB102 Potential DKA | BMS02961                   | BLOOD BICARBONATE DECREASED  | 10005359                     | MedDRA Version 19.0                |
| [19.0] MB102 Potential DKA | BMS02961                   | BLOOD BICARBONATE INCREASED  | 10005360                     | MedDRA Version 19.0                |
| [19.0] MB102 Potential DKA | BMS02961                   | BLOOD CHLORIDE               | 10005416                     | MedDRA Version 19.0                |
| [19.0] MB102 Potential DKA | BMS02961                   | BLOOD CHLORIDE ABNORMAL      | 10005417                     | MedDRA Version 19.0                |
| [19.0] MB102 Potential DKA | BMS02961                   | BLOOD CHLORIDE DECREASED     | 10005419                     | MedDRA Version 19.0                |
| [19.0] MB102 Potential DKA | BMS02961                   | BLOOD CHLORIDE INCREASED     | 10005420                     | MedDRA Version 19.0                |
| [19.0] MB102 Potential DKA | BMS02961                   | BLOOD GASES                  | 10005537                     | MedDRA Version 19.0                |
| [19.0] MB102 Potential DKA | BMS02961                   | BLOOD GASES ABNORMAL         | 10005539                     | MedDRA Version 19.0                |

# SUPPLEMENTARY DATA

Dapagliflozin  
BMS-512148

DKA Adjudication  
Committee Charter

| <b>BMS Custom SMQ Name</b> | <b>BMS Custom SMQ Code</b> | <b>MedDRA Preferred Term</b> | <b>MedDRA Preferred Code</b> | <b>Current MedDRA Version Term</b> |
|----------------------------|----------------------------|------------------------------|------------------------------|------------------------------------|
| <b>SSC_NAME</b>            | <b>SSC_CODE</b>            | <b>PT_NAME</b>               | <b>PT_CODE</b>               | <b>VERSION_TERM</b>                |
| [19.0] MB102 Potential DKA | BMS02961                   | BLOOD GLUCOSE                | 10005553                     | MedDRA Version 19.0                |
| [19.0] MB102 Potential DKA | BMS02961                   | BLOOD GLUCOSE ABNORMAL       | 10005554                     | MedDRA Version 19.0                |
| [19.0] MB102 Potential DKA | BMS02961                   | BLOOD GLUCOSE INCREASED      | 10005557                     | MedDRA Version 19.0                |
| [19.0] MB102 Potential DKA | BMS02961                   | BLOOD LACTIC ACID            | 10005632                     | MedDRA Version 19.0                |
| [19.0] MB102 Potential DKA | BMS02961                   | BLOOD LACTIC ACID ABNORMAL   | 10005633                     | MedDRA Version 19.0                |
| [19.0] MB102 Potential DKA | BMS02961                   | BLOOD LACTIC ACID DECREASED  | 10005634                     | MedDRA Version 19.0                |
| [19.0] MB102 Potential DKA | BMS02961                   | BLOOD LACTIC ACID INCREASED  | 10005635                     | MedDRA Version 19.0                |
| [19.0] MB102 Potential DKA | BMS02961                   | BLOOD OSMOLARITY             | 10005693                     | MedDRA Version 19.0                |
| [19.0] MB102 Potential DKA | BMS02961                   | BLOOD OSMOLARITY ABNORMAL    | 10005694                     | MedDRA Version 19.0                |
| [19.0] MB102 Potential DKA | BMS02961                   | BLOOD OSMOLARITY DECREASED   | 10005696                     | MedDRA Version 19.0                |
| [19.0] MB102 Potential DKA | BMS02961                   | BLOOD OSMOLARITY INCREASED   | 10005697                     | MedDRA Version 19.0                |
| [19.0] MB102 Potential DKA | BMS02961                   | BLOOD OSMOLARITY NORMAL      | 10005698                     | MedDRA Version 19.0                |
| [19.0] MB102 Potential DKA | BMS02961                   | BLOOD PH ABNORMAL            | 10005705                     | MedDRA Version 19.0                |
| [19.0] MB102 Potential DKA | BMS02961                   | BLOOD PH DECREASED           | 10005706                     | MedDRA Version 19.0                |
| [19.0] MB102 Potential DKA | BMS02961                   | BLOOD PH INCREASED           | 10005708                     | MedDRA Version 19.0                |

# SUPPLEMENTARY DATA

Dapagliflozin  
BMS-512148

DKA Adjudication  
Committee Charter

| BMS Custom SMQ Name        | BMS Custom SMQ Code | MedDRA Preferred Term                         | MedDRA Preferred Code | Current MedDRA Version Term |
|----------------------------|---------------------|-----------------------------------------------|-----------------------|-----------------------------|
| SSC_NAME                   | SSC_CODE            | PT_NAME                                       | PT_CODE               | VERSION_TERM                |
| [19.0] MB102 Potential DKA | BMS02961            | BLOOD POTASSIUM                               | 10005721              | MedDRA Version 19.0         |
| [19.0] MB102 Potential DKA | BMS02961            | BLOOD POTASSIUM ABNORMAL                      | 10005722              | MedDRA Version 19.0         |
| [19.0] MB102 Potential DKA | BMS02961            | BLOOD POTASSIUM DECREASED                     | 10005724              | MedDRA Version 19.0         |
| [19.0] MB102 Potential DKA | BMS02961            | BLOOD POTASSIUM INCREASED                     | 10005725              | MedDRA Version 19.0         |
| [19.0] MB102 Potential DKA | BMS02961            | BLOOD SODIUM                                  | 10005799              | MedDRA Version 19.0         |
| [19.0] MB102 Potential DKA | BMS02961            | BLOOD SODIUM ABNORMAL                         | 10005800              | MedDRA Version 19.0         |
| [19.0] MB102 Potential DKA | BMS02961            | BLOOD SODIUM DECREASED                        | 10005802              | MedDRA Version 19.0         |
| [19.0] MB102 Potential DKA | BMS02961            | BLOOD SODIUM INCREASED                        | 10005803              | MedDRA Version 19.0         |
| [19.0] MB102 Potential DKA | BMS02961            | BREATH ODOUR                                  | 10006326              | MedDRA Version 19.0         |
| [19.0] MB102 Potential DKA | BMS02961            | CARBON DIOXIDE                                | 10007220              | MedDRA Version 19.0         |
| [19.0] MB102 Potential DKA | BMS02961            | CARBON DIOXIDE DECREASED                      | 10007223              | MedDRA Version 19.0         |
| [19.0] MB102 Potential DKA | BMS02961            | CARBON DIOXIDE INCREASED                      | 10007225              | MedDRA Version 19.0         |
| [19.0] MB102 Potential DKA | BMS02961            | CENTRAL NERVOUS SYSTEM FUNCTION TEST ABNORMAL | 10007947              | MedDRA Version 19.0         |
| [19.0] MB102 Potential DKA | BMS02961            | CHILLS                                        | 10008531              | MedDRA Version 19.0         |
| [19.0] MB102 Potential DKA | BMS02961            | CIRCULATORY COLLAPSE                          | 10009192              | MedDRA Version 19.0         |

# SUPPLEMENTARY DATA

Dapagliflozin  
BMS-512148

DKA Adjudication  
Committee Charter

| <b>BMS Custom SMQ Name</b> | <b>BMS Custom SMQ Code</b> | <b>MedDRA Preferred Term</b>              | <b>MedDRA Preferred Code</b> | <b>Current MedDRA Version Term</b> |
|----------------------------|----------------------------|-------------------------------------------|------------------------------|------------------------------------|
| <b>SSC_NAME</b>            | <b>SSC_CODE</b>            | <b>PT_NAME</b>                            | <b>PT_CODE</b>               | <b>VERSION_TERM</b>                |
| [19.0] MB102 Potential DKA | BMS02961                   | COMA                                      | 10010071                     | MedDRA Version 19.0                |
| [19.0] MB102 Potential DKA | BMS02961                   | DEATH                                     | 10011906                     | MedDRA Version 19.0                |
| [19.0] MB102 Potential DKA | BMS02961                   | DEHYDRATION                               | 10012174                     | MedDRA Version 19.0                |
| [19.0] MB102 Potential DKA | BMS02961                   | DEPRESSED LEVEL OF CONSCIOUSNESS          | 10012373                     | MedDRA Version 19.0                |
| [19.0] MB102 Potential DKA | BMS02961                   | DIABETIC COMA                             | 10012650                     | MedDRA Version 19.0                |
| [19.0] MB102 Potential DKA | BMS02961                   | DIABETIC HYPERGLYCAEMIC COMA              | 10012668                     | MedDRA Version 19.0                |
| [19.0] MB102 Potential DKA | BMS02961                   | DIABETIC HYPEROSMOLAR COMA                | 10012669                     | MedDRA Version 19.0                |
| [19.0] MB102 Potential DKA | BMS02961                   | DIABETIC KETOACIDOSIS                     | 10012671                     | MedDRA Version 19.0                |
| [19.0] MB102 Potential DKA | BMS02961                   | DIABETIC KETOACIDOTIC HYPERGLYCAEMIC COMA | 10012672                     | MedDRA Version 19.0                |
| [19.0] MB102 Potential DKA | BMS02961                   | DISCOMFORT                                | 10013082                     | MedDRA Version 19.0                |
| [19.0] MB102 Potential DKA | BMS02961                   | DYSPEPSIA                                 | 10013946                     | MedDRA Version 19.0                |
| [19.0] MB102 Potential DKA | BMS02961                   | ELECTROENCEPHALOGRAM                      | 10014407                     | MedDRA Version 19.0                |
| [19.0] MB102 Potential DKA | BMS02961                   | ELECTROENCEPHALOGRAM ABNORMAL             | 10014408                     | MedDRA Version 19.0                |
| [19.0] MB102 Potential DKA | BMS02961                   | ELECTROLYTE IMBALANCE                     | 10014418                     | MedDRA Version 19.0                |
| [19.0] MB102 Potential DKA | BMS02961                   | ENDOCRINE DISORDER                        | 10014695                     | MedDRA Version 19.0                |

# SUPPLEMENTARY DATA

Dapagliflozin  
BMS-512148

DKA Adjudication  
Committee Charter

| BMS Custom SMQ Name        | BMS Custom SMQ Code | MedDRA Preferred Term | MedDRA Preferred Code | Current MedDRA Version Term |
|----------------------------|---------------------|-----------------------|-----------------------|-----------------------------|
| SSC_NAME                   | SSC_CODE            | PT_NAME               | PT_CODE               | VERSION_TERM                |
| [19.0] MB102 Potential DKA | BMS02961            | FATIGUE               | 10016256              | MedDRA Version 19.0         |
| [19.0] MB102 Potential DKA | BMS02961            | FEELING ABNORMAL      | 10016322              | MedDRA Version 19.0         |
| [19.0] MB102 Potential DKA | BMS02961            | FEELING COLD          | 10016326              | MedDRA Version 19.0         |
| [19.0] MB102 Potential DKA | BMS02961            | FEELING DRUNK         | 10016330              | MedDRA Version 19.0         |
| [19.0] MB102 Potential DKA | BMS02961            | FEELING HOT           | 10016334              | MedDRA Version 19.0         |
| [19.0] MB102 Potential DKA | BMS02961            | FEELING JITTERY       | 10016338              | MedDRA Version 19.0         |
| [19.0] MB102 Potential DKA | BMS02961            | FEELING OF RELAXATION | 10016352              | MedDRA Version 19.0         |
| [19.0] MB102 Potential DKA | BMS02961            | GASTROINTESTINAL PAIN | 10017999              | MedDRA Version 19.0         |
| [19.0] MB102 Potential DKA | BMS02961            | HANGOVER              | 10019133              | MedDRA Version 19.0         |
| [19.0] MB102 Potential DKA | BMS02961            | HEART RATE ABNORMAL   | 10019300              | MedDRA Version 19.0         |
| [19.0] MB102 Potential DKA | BMS02961            | HEART RATE INCREASED  | 10019303              | MedDRA Version 19.0         |
| [19.0] MB102 Potential DKA | BMS02961            | HEART RATE IRREGULAR  | 10019304              | MedDRA Version 19.0         |
| [19.0] MB102 Potential DKA | BMS02961            | HUNGER                | 10020466              | MedDRA Version 19.0         |
| [19.0] MB102 Potential DKA | BMS02961            | HYPERGLYCAEMIA        | 10020635              | MedDRA Version 19.0         |
| [19.0] MB102 Potential DKA | BMS02961            | HYPERLACTACIDAEMIA    | 10020660              | MedDRA Version 19.0         |



# SUPPLEMENTARY DATA

Dapagliflozin  
BMS-512148

DKA Adjudication  
Committee Charter

| <b>BMS Custom SMQ Name</b> | <b>BMS Custom SMQ Code</b> | <b>MedDRA Preferred Term</b> | <b>MedDRA Preferred Code</b> | <b>Current MedDRA Version Term</b> |
|----------------------------|----------------------------|------------------------------|------------------------------|------------------------------------|
| <b>SSC_NAME</b>            | <b>SSC_CODE</b>            | <b>PT_NAME</b>               | <b>PT_CODE</b>               | <b>VERSION_TERM</b>                |
| [19.0] MB102 Potential DKA | BMS02961                   | HYPEROSMOLAR STATE           | 10020697                     | MedDRA Version 19.0                |
| [19.0] MB102 Potential DKA | BMS02961                   | HYPOTENSION                  | 10021097                     | MedDRA Version 19.0                |
| [19.0] MB102 Potential DKA | BMS02961                   | HYPOVOLAEMIA                 | 10021137                     | MedDRA Version 19.0                |
| [19.0] MB102 Potential DKA | BMS02961                   | HYPOVOLAEMIC SHOCK           | 10021138                     | MedDRA Version 19.0                |
| [19.0] MB102 Potential DKA | BMS02961                   | INFANTILE COLIC              | 10021746                     | MedDRA Version 19.0                |
| [19.0] MB102 Potential DKA | BMS02961                   | KETOACIDOSIS                 | 10023379                     | MedDRA Version 19.0                |
| [19.0] MB102 Potential DKA | BMS02961                   | KETONURIA                    | 10023388                     | MedDRA Version 19.0                |
| [19.0] MB102 Potential DKA | BMS02961                   | KETOSIS                      | 10023391                     | MedDRA Version 19.0                |
| [19.0] MB102 Potential DKA | BMS02961                   | KUSSMAUL RESPIRATION         | 10023499                     | MedDRA Version 19.0                |
| [19.0] MB102 Potential DKA | BMS02961                   | LACTIC ACIDOSIS              | 10023676                     | MedDRA Version 19.0                |
| [19.0] MB102 Potential DKA | BMS02961                   | LETHARGY                     | 10024264                     | MedDRA Version 19.0                |
| [19.0] MB102 Potential DKA | BMS02961                   | LOSS OF CONSCIOUSNESS        | 10024855                     | MedDRA Version 19.0                |
| [19.0] MB102 Potential DKA | BMS02961                   | MALAISE                      | 10025482                     | MedDRA Version 19.0                |
| [19.0] MB102 Potential DKA | BMS02961                   | METABOLIC ACIDOSIS           | 10027417                     | MedDRA Version 19.0                |
| [19.0] MB102 Potential DKA | BMS02961                   | NAUSEA                       | 10028813                     | MedDRA Version 19.0                |

# SUPPLEMENTARY DATA

Dapagliflozin  
BMS-512148

DKA Adjudication  
Committee Charter

| <b>BMS Custom SMQ Name</b> | <b>BMS Custom SMQ Code</b> | <b>MedDRA Preferred Term</b> | <b>MedDRA Preferred Code</b> | <b>Current MedDRA Version Term</b> |
|----------------------------|----------------------------|------------------------------|------------------------------|------------------------------------|
| <b>SSC_NAME</b>            | <b>SSC_CODE</b>            | <b>PT_NAME</b>               | <b>PT_CODE</b>               | <b>VERSION_TERM</b>                |
| [19.0] MB102 Potential DKA | BMS02961                   | OESOPHAGEAL PAIN             | 10030180                     | MedDRA Version 19.0                |
| [19.0] MB102 Potential DKA | BMS02961                   | ORTHOSTATIC HYPOTENSION      | 10031127                     | MedDRA Version 19.0                |
| [19.0] MB102 Potential DKA | BMS02961                   | OSMOLAR GAP                  | 10031140                     | MedDRA Version 19.0                |
| [19.0] MB102 Potential DKA | BMS02961                   | OSMOLAR GAP ABNORMAL         | 10031141                     | MedDRA Version 19.0                |
| [19.0] MB102 Potential DKA | BMS02961                   | OSMOLAR GAP NORMAL           | 10031142                     | MedDRA Version 19.0                |
| [19.0] MB102 Potential DKA | BMS02961                   | OXYGEN SATURATION            | 10033316                     | MedDRA Version 19.0                |
| [19.0] MB102 Potential DKA | BMS02961                   | OXYGEN SATURATION ABNORMAL   | 10033317                     | MedDRA Version 19.0                |
| [19.0] MB102 Potential DKA | BMS02961                   | OXYGEN SATURATION DECREASED  | 10033318                     | MedDRA Version 19.0                |
| [19.0] MB102 Potential DKA | BMS02961                   | OXYGEN SATURATION INCREASED  | 10033320                     | MedDRA Version 19.0                |
| [19.0] MB102 Potential DKA | BMS02961                   | PCO2                         | 10034180                     | MedDRA Version 19.0                |
| [19.0] MB102 Potential DKA | BMS02961                   | PCO2 DECREASED               | 10034181                     | MedDRA Version 19.0                |
| [19.0] MB102 Potential DKA | BMS02961                   | PCO2 INCREASED               | 10034183                     | MedDRA Version 19.0                |
| [19.0] MB102 Potential DKA | BMS02961                   | PO2                          | 10035766                     | MedDRA Version 19.0                |
| [19.0] MB102 Potential DKA | BMS02961                   | PO2 DECREASED                | 10035768                     | MedDRA Version 19.0                |
| [19.0] MB102 Potential DKA | BMS02961                   | PO2 INCREASED                | 10035769                     | MedDRA Version 19.0                |

# SUPPLEMENTARY DATA

Dapagliflozin  
BMS-512148

DKA Adjudication  
Committee Charter

| <b>BMS Custom SMQ Name</b> | <b>BMS Custom SMQ Code</b> | <b>MedDRA Preferred Term</b> | <b>MedDRA Preferred Code</b> | <b>Current MedDRA Version Term</b> |
|----------------------------|----------------------------|------------------------------|------------------------------|------------------------------------|
| <b>SSC_NAME</b>            | <b>SSC_CODE</b>            | <b>PT_NAME</b>               | <b>PT_CODE</b>               | <b>VERSION_TERM</b>                |
| [19.0] MB102 Potential DKA | BMS02961                   | RETCHING                     | 10038776                     | MedDRA Version 19.0                |
| [19.0] MB102 Potential DKA | BMS02961                   | SEDATION                     | 10039897                     | MedDRA Version 19.0                |
| [19.0] MB102 Potential DKA | BMS02961                   | SENSATION OF BLOOD FLOW      | 10039996                     | MedDRA Version 19.0                |
| [19.0] MB102 Potential DKA | BMS02961                   | SENSE OF OPPRESSION          | 10040007                     | MedDRA Version 19.0                |
| [19.0] MB102 Potential DKA | BMS02961                   | SHOCK                        | 10040560                     | MedDRA Version 19.0                |
| [19.0] MB102 Potential DKA | BMS02961                   | SLUGGISHNESS                 | 10041052                     | MedDRA Version 19.0                |
| [19.0] MB102 Potential DKA | BMS02961                   | SOMNOLENCE                   | 10041349                     | MedDRA Version 19.0                |
| [19.0] MB102 Potential DKA | BMS02961                   | STUPOR                       | 10042264                     | MedDRA Version 19.0                |
| [19.0] MB102 Potential DKA | BMS02961                   | SUDDEN DEATH                 | 10042434                     | MedDRA Version 19.0                |
| [19.0] MB102 Potential DKA | BMS02961                   | THIRST                       | 10043458                     | MedDRA Version 19.0                |
| [19.0] MB102 Potential DKA | BMS02961                   | URINE OSMOLARITY             | 10046652                     | MedDRA Version 19.0                |
| [19.0] MB102 Potential DKA | BMS02961                   | URINE OSMOLARITY DECREASED   | 10046653                     | MedDRA Version 19.0                |
| [19.0] MB102 Potential DKA | BMS02961                   | URINE OSMOLARITY INCREASED   | 10046654                     | MedDRA Version 19.0                |
| [19.0] MB102 Potential DKA | BMS02961                   | VOMITING                     | 10047700                     | MedDRA Version 19.0                |
| [19.0] MB102 Potential DKA | BMS02961                   | VOMITING PROJECTILE          | 10047708                     | MedDRA Version 19.0                |

# SUPPLEMENTARY DATA

Dapagliflozin  
BMS-512148

DKA Adjudication  
Committee Charter

| <b>BMS Custom SMQ Name</b> | <b>BMS Custom SMQ Code</b> | <b>MedDRA Preferred Term</b>   | <b>MedDRA Preferred Code</b> | <b>Current MedDRA Version Term</b> |
|----------------------------|----------------------------|--------------------------------|------------------------------|------------------------------------|
| <b>SSC_NAME</b>            | <b>SSC_CODE</b>            | <b>PT_NAME</b>                 | <b>PT_CODE</b>               | <b>VERSION_TERM</b>                |
| [19.0] MB102 Potential DKA | BMS02961                   | COMA ACIDOTIC                  | 10049037                     | MedDRA Version 19.0                |
| [19.0] MB102 Potential DKA | BMS02961                   | SUDDEN CARDIAC DEATH           | 10049418                     | MedDRA Version 19.0                |
| [19.0] MB102 Potential DKA | BMS02961                   | ABDOMINAL MIGRAINE             | 10049714                     | MedDRA Version 19.0                |
| [19.0] MB102 Potential DKA | BMS02961                   | BLOOD GLUCOSE FLUCTUATION      | 10049803                     | MedDRA Version 19.0                |
| [19.0] MB102 Potential DKA | BMS02961                   | CARDIAC DEATH                  | 10049993                     | MedDRA Version 19.0                |
| [19.0] MB102 Potential DKA | BMS02961                   | THIRST DECREASED               | 10050200                     | MedDRA Version 19.0                |
| [19.0] MB102 Potential DKA | BMS02961                   | OXYGEN SATURATION IMMEASURABLE | 10051197                     | MedDRA Version 19.0                |
| [19.0] MB102 Potential DKA | BMS02961                   | ABDOMINAL REBOUND TENDERNESS   | 10052489                     | MedDRA Version 19.0                |
| [19.0] MB102 Potential DKA | BMS02961                   | TEMPERATURE INTOLERANCE        | 10057040                     | MedDRA Version 19.0                |
| [19.0] MB102 Potential DKA | BMS02961                   | BLOOD KETONE BODY              | 10057593                     | MedDRA Version 19.0                |
| [19.0] MB102 Potential DKA | BMS02961                   | BLOOD KETONE BODY INCREASED    | 10057594                     | MedDRA Version 19.0                |
| [19.0] MB102 Potential DKA | BMS02961                   | BLOOD KETONE BODY DECREASED    | 10057595                     | MedDRA Version 19.0                |
| [19.0] MB102 Potential DKA | BMS02961                   | URINE KETONE BODY ABSENT       | 10057596                     | MedDRA Version 19.0                |
| [19.0] MB102 Potential DKA | BMS02961                   | URINE KETONE BODY PRESENT      | 10057597                     | MedDRA Version 19.0                |
| [19.0] MB102 Potential DKA | BMS02961                   | BLOOD KETONE BODY PRESENT      | 10057598                     | MedDRA Version 19.0                |

# SUPPLEMENTARY DATA

Dapagliflozin  
BMS-512148

DKA Adjudication  
Committee Charter

| <b>BMS Custom SMQ Name</b> | <b>BMS Custom SMQ Code</b> | <b>MedDRA Preferred Term</b> | <b>MedDRA Preferred Code</b> | <b>Current MedDRA Version Term</b> |
|----------------------------|----------------------------|------------------------------|------------------------------|------------------------------------|
| <b>SSC_NAME</b>            | <b>SSC_CODE</b>            | <b>PT_NAME</b>               | <b>PT_CODE</b>               | <b>VERSION_TERM</b>                |
| [19.0] MB102 Potential DKA | BMS02961                   | BLOOD KETONE BODY ABSENT     | 10057600                     | MedDRA Version 19.0                |
| [19.0] MB102 Potential DKA | BMS02961                   | HYPOPERFUSION                | 10058558                     | MedDRA Version 19.0                |
| [19.0] MB102 Potential DKA | BMS02961                   | ACETONAEMIC VOMITING         | 10058938                     | MedDRA Version 19.0                |
| [19.0] MB102 Potential DKA | BMS02961                   | PCO2 ABNORMAL                | 10058982                     | MedDRA Version 19.0                |
| [19.0] MB102 Potential DKA | BMS02961                   | OXYGEN CONSUMPTION DECREASED | 10059165                     | MedDRA Version 19.0                |
| [19.0] MB102 Potential DKA | BMS02961                   | OXYGEN CONSUMPTION           | 10059167                     | MedDRA Version 19.0                |
| [19.0] MB102 Potential DKA | BMS02961                   | OXYGEN CONSUMPTION INCREASED | 10059168                     | MedDRA Version 19.0                |
| [19.0] MB102 Potential DKA | BMS02961                   | EARLY SATIETY                | 10059186                     | MedDRA Version 19.0                |
| [19.0] MB102 Potential DKA | BMS02961                   | URINE KETONE BODY            | 10059222                     | MedDRA Version 19.0                |
| [19.0] MB102 Potential DKA | BMS02961                   | BASE EXCESS                  | 10059961                     | MedDRA Version 19.0                |
| [19.0] MB102 Potential DKA | BMS02961                   | BASE EXCESS INCREASED        | 10059993                     | MedDRA Version 19.0                |
| [19.0] MB102 Potential DKA | BMS02961                   | BASE EXCESS DECREASED        | 10059994                     | MedDRA Version 19.0                |
| [19.0] MB102 Potential DKA | BMS02961                   | URINE LACTIC ACID            | 10060064                     | MedDRA Version 19.0                |
| [19.0] MB102 Potential DKA | BMS02961                   | URINE LACTIC ACID INCREASED  | 10060086                     | MedDRA Version 19.0                |
| [19.0] MB102 Potential DKA | BMS02961                   | URINE LACTIC ACID DECREASED  | 10060087                     | MedDRA Version 19.0                |

# SUPPLEMENTARY DATA

Dapagliflozin  
BMS-512148

DKA Adjudication  
Committee Charter

| <b>BMS Custom SMQ Name</b> | <b>BMS Custom SMQ Code</b> | <b>MedDRA Preferred Term</b>       | <b>MedDRA Preferred Code</b> | <b>Current MedDRA Version Term</b> |
|----------------------------|----------------------------|------------------------------------|------------------------------|------------------------------------|
| <b>SSC_NAME</b>            | <b>SSC_CODE</b>            | <b>PT_NAME</b>                     | <b>PT_CODE</b>               | <b>VERSION_TERM</b>                |
| [19.0] MB102 Potential DKA | BMS02961                   | BASE EXCESS POSITIVE               | 10060912                     | MedDRA Version 19.0                |
| [19.0] MB102 Potential DKA | BMS02961                   | BASE EXCESS NEGATIVE               | 10060915                     | MedDRA Version 19.0                |
| [19.0] MB102 Potential DKA | BMS02961                   | ABDOMINAL SYMPTOM                  | 10060926                     | MedDRA Version 19.0                |
| [19.0] MB102 Potential DKA | BMS02961                   | BLOOD ELECTROLYTES                 | 10061013                     | MedDRA Version 19.0                |
| [19.0] MB102 Potential DKA | BMS02961                   | BLOOD ELECTROLYTES ABNORMAL        | 10061014                     | MedDRA Version 19.0                |
| [19.0] MB102 Potential DKA | BMS02961                   | BLOOD ELECTROLYTES NORMAL          | 10061015                     | MedDRA Version 19.0                |
| [19.0] MB102 Potential DKA | BMS02961                   | METABOLIC FUNCTION TEST ABNORMAL   | 10061286                     | MedDRA Version 19.0                |
| [19.0] MB102 Potential DKA | BMS02961                   | PH BODY FLUID                      | 10061346                     | MedDRA Version 19.0                |
| [19.0] MB102 Potential DKA | BMS02961                   | FEELING OF BODY TEMPERATURE CHANGE | 10061458                     | MedDRA Version 19.0                |
| [19.0] MB102 Potential DKA | BMS02961                   | SENSATION OF FOREIGN BODY          | 10061549                     | MedDRA Version 19.0                |
| [19.0] MB102 Potential DKA | BMS02961                   | URINE ELECTROLYTES DECREASED       | 10061579                     | MedDRA Version 19.0                |
| [19.0] MB102 Potential DKA | BMS02961                   | BLOOD ELECTROLYTES DECREASED       | 10061715                     | MedDRA Version 19.0                |
| [19.0] MB102 Potential DKA | BMS02961                   | BLOOD ELECTROLYTES INCREASED       | 10061716                     | MedDRA Version 19.0                |
| [19.0] MB102 Potential DKA | BMS02961                   | BLOOD PH                           | 10061724                     | MedDRA Version 19.0                |
| [19.0] MB102 Potential DKA | BMS02961                   | PH BODY FLUID ABNORMAL             | 10062071                     | MedDRA Version 19.0                |

# SUPPLEMENTARY DATA

Dapagliflozin  
BMS-512148

DKA Adjudication  
Committee Charter

| BMS Custom SMQ Name        | BMS Custom SMQ Code | MedDRA Preferred Term                 | MedDRA Preferred Code | Current MedDRA Version Term |
|----------------------------|---------------------|---------------------------------------|-----------------------|-----------------------------|
| SSC_NAME                   | SSC_CODE            | PT_NAME                               | PT_CODE               | VERSION_TERM                |
| [19.0] MB102 Potential DKA | BMS02961            | PH BODY FLUID DECREASED               | 10062072              | MedDRA Version 19.0         |
| [19.0] MB102 Potential DKA | BMS02961            | PH BODY FLUID INCREASED               | 10062073              | MedDRA Version 19.0         |
| [19.0] MB102 Potential DKA | BMS02961            | PO2 ABNORMAL                          | 10062087              | MedDRA Version 19.0         |
| [19.0] MB102 Potential DKA | BMS02961            | URINE ELECTROLYTES                    | 10062229              | MedDRA Version 19.0         |
| [19.0] MB102 Potential DKA | BMS02961            | URINE ELECTROLYTES NORMAL             | 10062230              | MedDRA Version 19.0         |
| [19.0] MB102 Potential DKA | BMS02961            | SPECIFIC GRAVITY BODY FLUID           | 10062256              | MedDRA Version 19.0         |
| [19.0] MB102 Potential DKA | BMS02961            | SPECIFIC GRAVITY BODY FLUID ABNORMAL  | 10062257              | MedDRA Version 19.0         |
| [19.0] MB102 Potential DKA | BMS02961            | SPECIFIC GRAVITY BODY FLUID DECREASED | 10062258              | MedDRA Version 19.0         |
| [19.0] MB102 Potential DKA | BMS02961            | SPECIFIC GRAVITY BODY FLUID INCREASED | 10062259              | MedDRA Version 19.0         |
| [19.0] MB102 Potential DKA | BMS02961            | SPECIFIC GRAVITY BODY FLUID NORMAL    | 10062260              | MedDRA Version 19.0         |
| [19.0] MB102 Potential DKA | BMS02961            | ENDOCRINE TOXICITY                    | 10063003              | MedDRA Version 19.0         |
| [19.0] MB102 Potential DKA | BMS02961            | BASE EXCESS ABNORMAL                  | 10063336              | MedDRA Version 19.0         |
| [19.0] MB102 Potential DKA | BMS02961            | SUDDEN UNEXPLAINED DEATH IN EPILEPSY  | 10063894              | MedDRA Version 19.0         |
| [19.0] MB102 Potential DKA | BMS02961            | CARBON DIOXIDE ABNORMAL               | 10064156              | MedDRA Version 19.0         |
| [19.0] MB102 Potential DKA | BMS02961            | PAO2/FIO2 RATIO DECREASED             | 10065413              | MedDRA Version 19.0         |

# SUPPLEMENTARY DATA

Dapagliflozin  
BMS-512148

DKA Adjudication  
Committee Charter

| <b>BMS Custom SMQ Name</b> | <b>BMS Custom SMQ Code</b> | <b>MedDRA Preferred Term</b>                              | <b>MedDRA Preferred Code</b> | <b>Current MedDRA Version Term</b> |
|----------------------------|----------------------------|-----------------------------------------------------------|------------------------------|------------------------------------|
| <b>SSC_NAME</b>            | <b>SSC_CODE</b>            | <b>PT_NAME</b>                                            | <b>PT_CODE</b>               | <b>VERSION_TERM</b>                |
| [19.0] MB102 Potential DKA | BMS02961                   | REGURGITATION                                             | 10067171                     | MedDRA Version 19.0                |
| [19.0] MB102 Potential DKA | BMS02961                   | COMA SCALE ABNORMAL                                       | 10069709                     | MedDRA Version 19.0                |
| [19.0] MB102 Potential DKA | BMS02961                   | HYPOINSULINAEMIA                                          | 10070070                     | MedDRA Version 19.0                |
| [19.0] MB102 Potential DKA | BMS02961                   | HYPERGLYCAEMIC UNCONSCIOUSNESS                            | 10071286                     | MedDRA Version 19.0                |
| [19.0] MB102 Potential DKA | BMS02961                   | HUMIDITY INTOLERANCE                                      | 10072791                     | MedDRA Version 19.0                |
| [19.0] MB102 Potential DKA | BMS02961                   | ORGANIC ACID ANALYSIS ABNORMAL                            | 10072962                     | MedDRA Version 19.0                |
| [19.0] MB102 Potential DKA | BMS02961                   | ORGANIC ACID ANALYSIS                                     | 10072963                     | MedDRA Version 19.0                |
| [19.0] MB102 Potential DKA | BMS02961                   | URINE OSMOLARITY NORMAL                                   | 10073410                     | MedDRA Version 19.0                |
| [19.0] MB102 Potential DKA | BMS02961                   | HYPEROSMOLAR HYPERGLYCAEMIC STATE                         | 10076413                     | MedDRA Version 19.0                |
| [19.0] MB102 Potential DKA | BMS02961                   | MENTAL FATIGUE                                            | 10076757                     | MedDRA Version 19.0                |
| [19.0] MB102 Potential DKA | BMS02961                   | TRANSCRANIAL ELECTRICAL MOTOR EVOKED POTENTIAL MONITORING | 10077471                     | MedDRA Version 19.0                |



## SUPPLEMENTARY DATA

### DEPICT-1 Principal Investigators

#### Australia:

**Joseph Proietto**, Heidelberg Repatriation Hospital, Melbourne, Victoria, Australia; **Stephen Stranks**, Repatriation General Hospital, Adelaide, South Australia, Australia; **Roger Chen**, Concord Repatriation General Hospital, Sydney, New South Wales, Australia; **David O'Neal**, University of Melbourne, Victoria, Australia; **Alexia Pape**, Wollongong Hospital, Wollongong, New South Wales, Australia; **Mark Forbes**, Gold Coast Hospital, Southport, Queensland, Australia; **Claire Morbey**, AIM Centre, Newcastle, New South Wales, Australia.

#### Austria:

**Anton Luger**, AKH Wien, Vienna, Austria; **Ursula Hanusch**, Zentrum für klinische Studien Dr. Hanusch GmbH, Vienna, Austria; **Christoph Schnack**, Krakenhaus Rudolfstiftung, Vienna, Austria; **Evelyn Fliesser-Goerzer**, Ordination Dr. Fliesser-Goerzer, St. Stefan, Austria; **Bertram Hoelzl**, St. Veit im Pongau, Austria; **Christoph Ebenbichler**, LKH Innsbruck, Innsbruck, Austria; **Rudolf Prager**, Krankenhaus Hietzing, Vienna, Austria.

#### Belgium:

**Luc Van Gaal**, Universitair Ziekenhuis Antwerpen, Edegem, Belgium; **Chris Vercammen**, Imelda Ziekenhuis, Bonheiden, Belgium; **Andre Scheen**, Chu Du Sart Tilman, Liege, Belgium; **Chantal Mathieu**, University of Leuven, Leuven, Belgium; **Francis Duyck**, Diabetes and endocrinology/diabetes clinic, Onthaal, Belgium; **Frank Nobels**, Onze-Lieve-Vrouw Ziekenhuis, Aalst Moorselbaan, Belgium; **Johannes Ruige**, University of Ghent, Ghent, Belgium.

#### Canada:

**Naresh Aggarwal**, Aggarwal And Associates, Brampton, Ontario, Canada; **Vincent Woo**, Health Sciences Centre Diabetes Research Centre, Winnipeg, Manitoba, Canada; **Bruno St-Pierre**, Université du Québec à Rimouski, Québec) Canada; **Richard Dumas**, Centre De Recherche Clinique De Laval, Laval, Québec, Canada; **Irene Hramiak**, St. Josephs Health Care, London, Ontario, Canada; **Thomas Elliott**, University of British Columbia, Vancouver, British Columbia, Canada.

#### Denmark:

**Troels Krarup Hansen**, Aarhus Universitets Hospital, Aarhus, Denmark; **Jan Erik Henriksen**, Odense University Hospital, Odense, Denmark; **Jeppé Gram**, Sydvestjysk Sygehus Esbjerg, Esbjerg, Denmark; **Aina Lihn**, Regionshospitalet Randers, Randers, Denmark; **Jens Bruun**, Aarhus University Hospital, Aarhus, Denmark.

#### Finland:

**Juha Saltevo**, Suomen Terveys Talo Jyväskylä, Jyväskylä, Finland; **Jyrki Taurio**, FinnMedi OY, Tampere, Finland; **Jorma Strand**, Terveystalo Oulu Diapoints, Oulu, Finland; **Timo Valle**, Mehilainen Diabetes Clinic, Helsinki, Finland; **Sakari Nieminen**, Ite Lasaretti, Kuopio, Finland; **Kirsi Pietilainen**, Biomedicum Obesity Research Unit, University of Helsinki, Helsinki.

#### France:

**Bruno Guerci**, Hopital De Brabois- C H U De Nancy, Vandoeuvre les Nancy, France; **Samy Hadjadj**, CHU de la Milettrie, Poitiers Cedex, France; **Bertrand Cariou**, Hopital Nord Laennec Chu De Nantes, Saint Herblain Cedex, France; **Bruno Verges**, Centre Hospitalier Universitaire Dijon Bocage, Dijon, France; **Sophie Borot**,

## SUPPLEMENTARY DATA

CHU Hopital Jean Minjoz, Besancon, France; **Alfred Penfornis**, Centre Hospitalier Sud Francilien, Corbeil Essonnes, France.

### Germany:

**Diethelm Tschöpe**, Ruhr University, Bochum, Germany; **Thomas Schaum**, RED Institut GmbH, Oldenburg, Germany; **Cornelia Marck**, Praxis Dr. Marck, Pohlheim, Germany; **Thomas Horacek**, Forschungszentrum Ruhr, Witten, Germany; **Ludger Rose**, Institut für Diabetesforschung GmbH, Münster, Germany; **Gerhard Klausmann**, Crc For Hematology, Oncology And Diabetic Diseases, Bavaria, Germany; **Joerg Luedemann**, Praxis Dr. Ludemann, Falkensee, Germany; **Steffi Appelt**, Ambulanzentrum Dr. Mueller Dr. Appelt, Schweinfurt, Germany; **Ulrich Aigner**, Praxis Dr. Aigner, Sulzbach-Rosenberg, Germany; **Rolf Goebel**, Praxis Dres. R. Goebel und Ch. Igler, Asslar, Germany; **Thomas Behnke**, Diabetological Competence Center Neuwied, Neuwied, Germany; **Anette-Gabriele Ziegler**, Institute of Diabetes Research, Helmholtz Zentrum, München.

### Hungary:

**Eva Peterfai**, Drc Gyogyszervizsgalo Kozpont Kft, Balatonfüred, Hungary; **Zsuzsanna Kerenyi**, Trantor 99 BT, Budapest, Hungary; **Tamas Oroszlan**, Zala Megyei Korhaz, Zalaegerszeg, Hungary; **Gyula G. Kiss**, Swan Med Hungary Kft., Letavertes, Hungary; **Laszlo Konyves**, Lausmed Kft, Baja, Hungary; **Gyorgyi Piros**, Szegedi Tudományegyetem II.sz. Belklinika és Kardiologiai Kozpont, Szeged, Hungary.

### Israel:

**Moshe Phillip**, Schneider Children's Medical Center of Israel, Petah Tikva, Israel; **Ofri Mosenzon**, Hadassah Ein-Karem Medical Center, Jerusalem, Israel; **Naim Shehadeh**, Rambam Medical Center, Haifa, Israel; **Faiad Adawi**, Ziv Medical Center, Maimonides, Safed, Israel; **Julio Wainstein**, Edith Wolfson Medical Center, Holon, Israel.

### Italy:

**Francesco Dotta**, Azienda Ospedaliera Universitaria Senese, Siena, Italy; **Piermarco Piatti**, Ospedale San Raffaele, Milano, Italy; **Stefano Genovese**, IRCCS Multimedica, Milano, Italy; **Agostino Consoli**, CeSI Universita' D'Annunzio, Chieti, Italy; **Paolo Di Bartolo**, Azienda Usl Di Ravenna, Ravenna, Italy; **Edoardo Mannucci**, A.O.U. Careggi, Firenze, Italy; **Carla Giordano**, A.O.U. Policlinico Paolo Giaccone, Palermo, Italy; **Annunziata Lapolla**, UOC Diabetologia e Dietetica, Padova, Italy.

### Mexico:

**Carlos Aguilar**, Instituto Nacional De Ciencias Medicas Y Nutricion S.Z, Distrito Federal, Distrito Federal, Mexico; **Alberto Esteban Bazzoni Ruiz**, Centro Para Des. De Med. Y De Asist. Med. Esp. S. C. Torreon, Torreon, Coahuila, Mexico; **Guillermo Mondragon Ramirez**, Instituto Mexicano De Transplantes, Cuernavaca, Morelos, Mexico; **Emilia Pelayo Orozco**, Centro de Investigacion Medica de Occidente S.C., Zapopan, Jalisco, Mexico; **Carlos Alejandro Stobschinski de Alba**, Centro de Investigacion Medica Integral, Guadalajara, Jalisco, Mexico; **Carlos Eduardo Medina Pech**, Medical Care And Research, Merida, Yucatán, Mexico; **Jose Garza Ruiz**, Internal Medicine Clin Trials, Monterrey, Nuevo Leon, Mexico; **Leobardo Sauque Reyna**, Instituto de Diabetes Obesidad y Nutrición S.C., Cuernavaca, Morelos, Mexico; **Guillermo Llamas Esperon**, Hospital Cardiológica De Aguascalientes, Aguascalientes, Aguascalientes, Mexico; **Luis Alejandro Nevarez Ruiz**, Investigacion en Salud y Metabolismo SC, Chihuahua, Chihuahua, Mexico; **Maricela Vidrio Velazquez**, Unidad de Investigación Clínica CardioMetabólica de Occidente, Guadalajara, Jalisco, Mexico; **Fernando Flores Lozano**, Hospital "Dr. Angel Leano", Zapopan, Jalisco, Mexico; **Jose Gerardo Gonzalez Gonzalez**, Hospital Universitario Dr. Jose Eleuterio Gonzalez, Monterrey, Nuevo Leon, Mexico; **Pedro Alberto Garcia-Hernandez**, Hospital Universitario Dr. Jose Eleuterio Gonzalez, Monterrey, Nuevo Leon, Mexico; **Roberto Araujo Silva**, Monterrey International Research Center, Monterrey, Nuevo Leon, Mexico; **Efrain Villeda-Espinosa**, Hospital De Jesus, Mexico City, Distrito Federal, Mexico.

## SUPPLEMENTARY DATA

### Romania:

**Cristina Mistodie**, CMI DR. Mistodie Cristina Victoria, Galati, Romania; **Daniela Popescu**, Kristef MED SRL, Dolj, Romania; **Ciprian Constantin**, Dr Carol Davila Central Military, București, Romania; **Alina Nicolau**, Inst Nat de Diab, Nutritie si Boli Metabolice NC Paulescu, București, Romania; **Bogdan Popa**, Emergency County Hospital, Ploiesti, Romania; **Romulus Timar**, County Emergency Hospital Timisoara, Timisoara, Romania; **Cristian Serafinceanu**, Inst Nat de Diab, Nutritie si Boli Metabolice NC Paulescu, București, Romania; **Ella Pintilei**, Consultmed SRL, Iasi, Romania.

### Spain:

**Alfonso Soto**, Complejo Hospitalario Universitario A Coruna, A Coruna, Spain; **Margarita Gimenez**, Hospital Clinic I Provincial, Barcelona, Spain; **Juan Merino**, Hospital Universitario La Fe, Valencia, Spain; **Cristobal Morales**, Hosp Univ Virgen Macarena, Sevilla, Spain; **Pedro Mezquita**, Clinica San Pedro, Almeria, Spain.

### Sweden:

**Johan Jendle**, Karlstad Central Hospital, Karlstad, Sweden; **Bengt-Olov Tengmark**, City Diabetes, Stockholm, Sweden; **Jan Eriksson**, Uppsala University Hospital, Uppsala, Sweden; **Magnus Londahl**, Skanes University Hospital, Lund, Sweden; **Bjorn Eliasson**, Sahlgrenska University Hospital, Gothenberg, Sweden.

### United Kingdom:

**Anthony Gunstone**, Staploe Medical Centre, Soham, Ely, Cambridgeshire, United Kingdom; **Simon R Heller**, Northern General Hospital, Sheffield, Yorkshire, United Kingdom; **Ken Darzy**, Queen Elizabeth II Hospital, Howlands, Welwyn Garden City, Hertfordshire, United Kingdom; **Peter Mansell**, Nottingham University Hospitals NHS Trust, Nottingham, United Kingdom; **Melanie Davies**, Diabetes Research Centre, University of Leicester, Leicester General Hospital, Leicester, United Kingdom; **Rory Reed**, Aston Clinton Surgery, Aston Clinton, Aylesbury, Buckinghamshire, United Kingdom; **Duncan Browne**, Royal Cornwall Hospital, Truro, Cornwall, United Kingdom; **Hamish Courtney**, Royal Victoria Hospital, Belfast, County Durham, United Kingdom; **Wayne Turner**, Burbage Surgery, Burbage, Hinckley, Leicestershire, United Kingdom; **Mark Blagden**, Ashgate Medical Practice, Chesterfield, Derbyshire, United Kingdom; **Rory McCrimmon**, Ninewells Hospital and Medical School, Dundee, United Kingdom.

### United States of America:

**Paresh Dandona**, State University of New York at Buffalo, Buffalo, NY, USA; **Richard Bergenstal**, International Diabetes Center, Minneapolis, USA; **Wendy Lane**, Mountain Diabetes And Endocrine Center, Asheville, North Carolina, USA; **Kathryn Lucas**, Diabetes & Endocrinology Consultants, Morehead City, North Carolina, USA; **Alexander White**, Progressive Medical Research, Port Orange, Florida, USA; **Shichun Bao**, Vanderbilt Diabetes Center, Nashville, Tennessee, USA; **Judith White**, Holston Medical Group, Kingsport, Tennessee, USA; **Curtis Jantzi**, Wellmont Holston Valley Medical Center, Kingston, Tennessee; **Neda Rasouli**, Denver Va Medical Center, Denver, Colorado, USA; **William Ervin**, InterMmed PA, Portland, Maine, USA; **Lorena Lewy-Alterbaum**, ALL Medical Research LLC, Cooper City, Florida, USA; **Yehuda Handelsman**, Metabolic Institute of America, Tarzana, California, USA; **Bresta Miranda-Palma**, University Of Miami Diabetes Research Institute, Miami, Florida, USA; **Alan Cleland**, Solutions Through Advanced Research Inc, Jacksonville, Florida, USA; **Raymond Fink**, Diabetes And Endocrine Associates, La Mesa, California, USA; **Helena Rodbard**, Drs. Rodbard and Dempsey, Rockville, Maryland, USA; **Samer Nakhle**, Palm Research Center, Inc, Las Vegas, Nevada, USA; **Craig Greenberg**, Borgess Research Institute, Kalamazoo, Michigan, USA; **Alan Schorr**, St Mary Medica Center, Research Institute, Langhorne, Pennsylvania, USA; **Harold Bays**, L-Marc Research Center, Louisville, Kentucky, USA; **Debra Simmons**, Utah Diabetes and Endocrinology Center (UDEC), Salt Lake City, Utah, USA; **Eric Klein**, Capital Clinical Research Center, Olympia, Washington, USA; **Laurie Kane**, Nisus Research, Petoskey, Michigan, USA; **Norman Fishman**, Diabetes & Endocrinology Specialists Inc, Chesterfield, Missouri, USA; **Eli Ipp**, LA Biomed Research Institute at Harbor-UCLA Medical

## SUPPLEMENTARY DATA

Center, Torrance, California, USA; **Satish Garg**, University of Colorado, Barbara Davis Center, Aurora, Colorado; **Anuj Bhargava**, Iowa Diabetes And Endocrinology Research Center, Plc, Des Moines, Iowa, USA; **Michelle Zaniewski Singh**, Michelle Zaniewski Md.,Pa, Houston, Texas, USA; **Julio Rosenstock**, Dallas Diabetes & Endocrine Center, Dallas, Texas, USA; **James Thrasher**, Medical Investigations, Inc., Little Rock, Arkansas, USA; **Mark Warren**, Physicians East P.A., Greenville, North Carolina, USA; **Laura Young**, University of North Carolina, Chapel Hill, North Carolina, USA; **Vanita Aroda**, MedStar Health Research Institute, Hyattsville, Maryland, USA; **Jeremy Pettus**, VA San Diego Healthcare System, San Diego, California, USA; **David Liljenquist**, Rocky Mountain Diabetes And Osteoporosis Center, Idaho Falls, Idaho, USA; **Robert Busch**, Albany Medical College, Albany, New York, USA; **Jonathan Wise**, Diabetes and metabolism Associates, Metairie, Louisiana, USA; **David Kayne**, The Medical Group of Encino, Encino, California, USA; **William Biggs**, Amarillo Medical Specialists, LLP, Amarillo, Texas, USA.

**Supplementary Table S1.** Patient demographic and baseline characteristics (full analysis set)

|                                         | <b>Dapagliflozin 5 mg<br/>(N=259)</b> | <b>Dapagliflozin 10 mg<br/>(N=259)</b> | <b>Placebo (N=260)</b> |
|-----------------------------------------|---------------------------------------|----------------------------------------|------------------------|
| Sex, Male, n (%)                        | 111 (42.9)                            | 130 (50.2)                             | 132 (50.8)             |
| Mean age, years (SD)                    | 41.9 (14.1)                           | 42.7 (14.1)                            | 42.7 (13.6)            |
| Body weight, kg (SD)                    | 81.0 (18.4)                           | 82.1 (17.4)                            | 84.4 (18.3)            |
| BMI, kg/m <sup>2</sup> (SD)             | 28.4 (5.8)                            | 28.2 (5.2)                             | 28.6 (5.3)             |
| Duration of T1D, years (SD)             | 19.7 (12.0)                           | 19.9 (11.1)                            | 21.2 (12.2)            |
| HbA1c (%), mean (SD)                    | 8.53 (0.71)                           | 8.52 (0.64)                            | 8.53 (0.67)            |
| HbA1c category, n (%)                   |                                       |                                        |                        |
| ≥7.5 to <9.0%                           | 194 (74.9)                            | 198 (76.4)                             | 194 (74.6)             |
| ≥9.0 to ≤10.5%                          | 65 (25.1)                             | 61 (23.6)                              | 66 (25.4)              |
| Total insulin dose, IU (SD)             | 62.1 (44.2)                           | 59.4 (28.2)                            | 63.1 (29.3)            |
| Method of insulin administration, n (%) |                                       |                                        |                        |
| MDI                                     | 162 (62.5)                            | 165 (63.7)                             | 165 (63.5)             |
| CSII                                    | 97 (37.5)                             | 94 (36.3)                              | 95 (36.5)              |

BMI, body mass index; CSII, continuous subcutaneous insulin infusion; HbA1c, glycated haemoglobin; MDI, multiple daily injections; T1D, type 1 diabetes; SD, standard deviation.

# SUPPLEMENTARY DATA

**Supplementary Table S2.** Efficacy endpoints at Week 52 (full analysis set)

|                                                                                                                                                           | <b>Dapagliflozin 5<br/>mg (N=259)</b> | <b>Dapagliflozin 10<br/>mg (N=259)</b> | <b>Placebo (N=260)</b>           |
|-----------------------------------------------------------------------------------------------------------------------------------------------------------|---------------------------------------|----------------------------------------|----------------------------------|
| Patients with HbA1c reduction<br>≥0.5%, %                                                                                                                 | 43.0                                  | 45.7                                   | 25.3                             |
| Odds ratio vs. placebo (95%<br>CI)                                                                                                                        | 2.30 (1.57, 3.39)                     | 2.62 (1.78, 3.86)                      | -                                |
| Patients with HbA1c reduction<br>≥0.5% and no severe<br>hypoglycaemia, %                                                                                  | 40.2                                  | 42.1                                   | 23.7                             |
| Odds ratio vs. placebo (95%<br>CI)                                                                                                                        | 2.22 (1.50, 3.28)                     | 2.45 (1.66, 3.61)                      | -                                |
| Patients with HbA1c <7.0%, %                                                                                                                              | 7.0                                   | 5.5                                    | 2.7                              |
| Odds ratio vs. placebo (95%<br>CI)                                                                                                                        | 2.57 (1.11, 5.98)                     | 2.00 (0.83, 4.79)                      | -                                |
| Adjusted mean change in<br>fasting plasma glucose from<br>baseline to Week 52, mmol/L<br>(SE)                                                             | -1.09 (0.28)                          | -0.88 (0.28)                           | 0.44 (0.28)                      |
| Difference vs. placebo (95%CI)                                                                                                                            | -1.53 (-2.27, -<br>0.79)              | -1.32 (-2.06, -<br>0.58)               | -                                |
| Number of patients with<br>hypertension at baseline                                                                                                       | 38                                    | 40                                     | 44                               |
| Adjusted mean change in<br>seated systolic blood pressure<br>from baseline to Week 52 in<br>patients with hypertension at<br>baseline, mmHg (SE) [95% CI] | -9.05 (2.14) [-<br>13.28, -4.81]      | -13.30 (2.04) [-<br>17.35, -9.26]      | -7.92 (2.02) [-<br>11.93, -3.92] |
| Difference vs. placebo (95%CI)                                                                                                                            | -1.12 (-6.57,<br>4.32)                | -5.38 (-10.81,<br>0.04)                | -                                |

# SUPPLEMENTARY DATA

**Supplementary Table S3.** Nature of SAEs up to Week 56 (safety analysis set)

| <b>Adverse event, n (%)</b>                                         | <b>Dapagliflozin 5 mg (N=277)</b> | <b>Dapagliflozin 10 mg (N=296)</b> | <b>Placebo (N=260)</b> |
|---------------------------------------------------------------------|-----------------------------------|------------------------------------|------------------------|
| ≥1 Serious adverse events                                           | 37 (13.4)                         | 40 (13.5)                          | 30 (11.5)              |
| Metabolism and nutrition disorders                                  | 16 (5.8)                          | 18 (6.1)                           | 6 (2.3)                |
| Gastrointestinal disorders                                          | 2 (0.7)                           | 6 (2.0)                            | 1 (0.4)                |
| Injury, poisoning and procedural complications                      | 3 (1.1)                           | 5 (1.7)                            | 6 (2.3)                |
| Cardiac disorders                                                   | 1 (0.4)                           | 2 (0.7)                            | 1 (0.4)                |
| General disorders and administration site conditions                | 1 (0.4)                           | 3 (1.0)                            | 2 (0.8)                |
| Infections and infestations                                         | 5 (1.8)                           | 4 (1.4)                            | 6 (2.3)                |
| Investigations                                                      | 0                                 | 1 (0.3)                            | 0                      |
| Musculoskeletal and connective tissue disorders                     | 1 (0.4)                           | 1 (0.3)                            | 3 (1.2)                |
| Neoplasms benign, malignant and unspecified (incl cysts and polyps) | 3 (1.1)                           | 4 (1.4)                            | 0                      |
| Reproductive system and breast disorders                            | 1 (0.4)                           | 1 (0.3)                            | 0                      |
| Vascular disorders                                                  | 0                                 | 2 (0.7)                            | 1 (0.4)                |
| Skin and subcutaneous tissue disorders                              | 0                                 | 1 (0.3)                            | 0                      |
| Endocrine disorders                                                 | 0                                 | 0                                  | 1 (0.4)                |
| Eye disorders                                                       | 2 (0.7)                           | 0                                  | 1 (0.4)                |
| Hepatobiliary disorders                                             | 1 (0.4)                           | 0                                  | 1 (0.4)                |
| Nervous system disorders                                            | 2 (0.7)                           | 0                                  | 1 (0.4)                |
| Pregnancy, puerperium and perinatal conditions                      | 1 (0.4)                           | 0                                  | 0                      |
| Renal and urinary disorders                                         | 1 (0.4)                           | 0                                  | 0                      |
| Psychiatric disorders                                               | 0                                 | 0                                  | 1 (0.4)                |
| Respiratory, thoracic and mediastinal disorders                     | 0                                 | 0                                  | 1 (0.4)                |

# SUPPLEMENTARY DATA

**Supplementary Table S4.** Vital signs and ECG parameters at baseline and Week 52 (safety analysis set)

| Parameter, n (%)                                | Dapagliflozin 5 mg (N=277) | Dapagliflozin 10 mg (N=296) | Placebo (N=260) |
|-------------------------------------------------|----------------------------|-----------------------------|-----------------|
| Mean seated systolic blood pressure, mmHg (SD)  |                            |                             |                 |
| Baseline                                        | 121.9 (14.5)               | 123.1 (15.4)                | 124.2 (14.7)    |
| Week 52                                         | 120.8 (13.9)               | 120.7 (14.8)                | 125.7 (15.2)    |
| Mean seated diastolic blood pressure, mmHg (SD) |                            |                             |                 |
| Baseline                                        | 74.4 (9.1)                 | 74.6 (9.3)                  | 74.7 (9.9)      |
| Week 52                                         | 74.2 (8.6)                 | 73.7 (9.1)                  | 75.2 (9.5)      |
| Mean seated heart rate, bpm (SD)                |                            |                             |                 |
| Baseline                                        | 74.5 (11.1)                | 75.2 (10.7)                 | 74.0 (11.6)     |
| Week 52                                         | 75.4 (10.3)                | 74.5 (10.1)                 | 74.5 (11.1)     |
| Electrocardiogram summary, n (%)                |                            |                             |                 |
| Baseline                                        |                            |                             |                 |
| Normal                                          | 225 (81.2)                 | 243 (82.1)                  | 201 (77.3)      |
| Abnormal                                        | 52 (18.8)                  | 53 (17.9)                   | 59 (22.7)       |
| Not reported                                    | 0                          | 0                           | 0               |
| Week 52                                         |                            |                             |                 |
| Normal                                          | 216 (78.0)                 | 232 (78.4)                  | 200 (76.9)      |
| Abnormal                                        | 41 (14.8)                  | 45 (15.2)                   | 36 (13.8)       |
| Not reported                                    | 20 (7.2)                   | 19 (6.4)                    | 24 (9.2)        |

# SUPPLEMENTARY DATA

## Supplementary Figure S1. Patient disposition

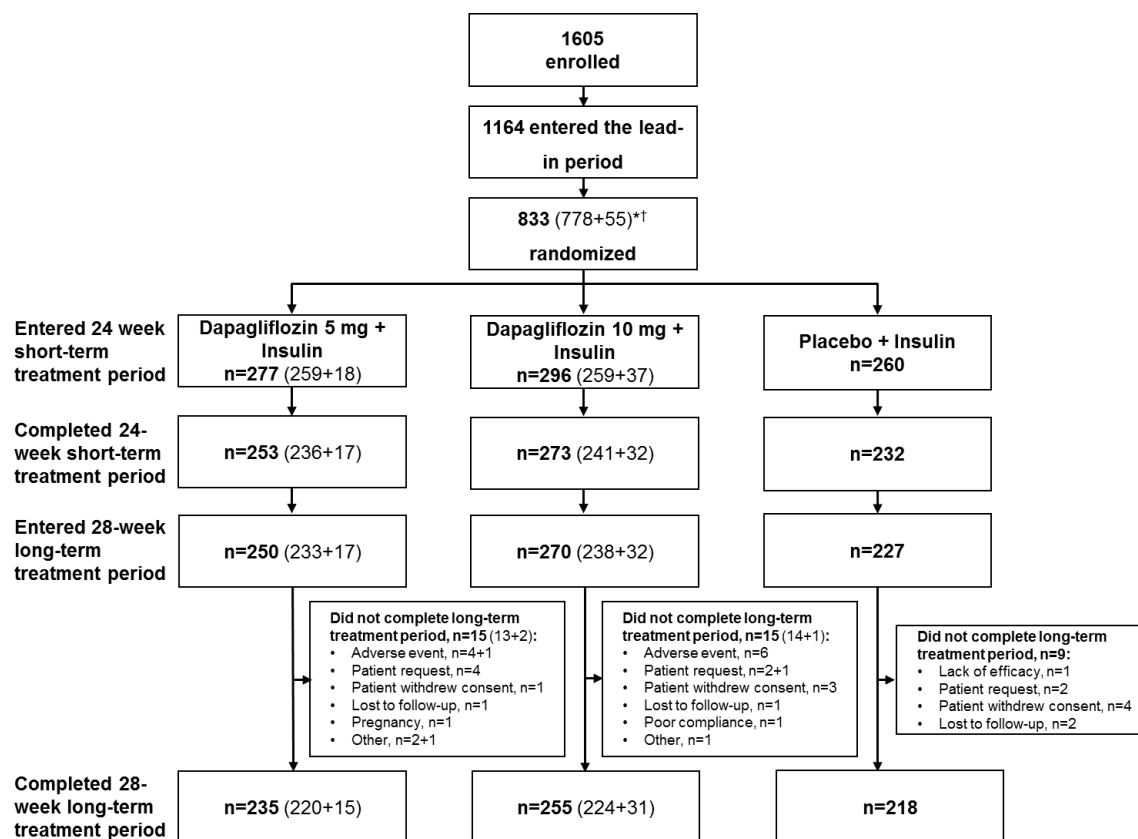

\*55 patients were randomly assigned before discovery of an error with the IVRS, these patients are not included in the full analysis set. †One patient was randomized in error and did not receive treatment



# SUPPLEMENTARY DATA

**Supplementary Figure S2.** Placebo-corrected changes from baseline HbA1c with (A) dapagliflozin 5 mg and (B) dapagliflozin 10 mg; stratified by baseline HbA1c, method of insulin administration, and CGM use (full analysis set)

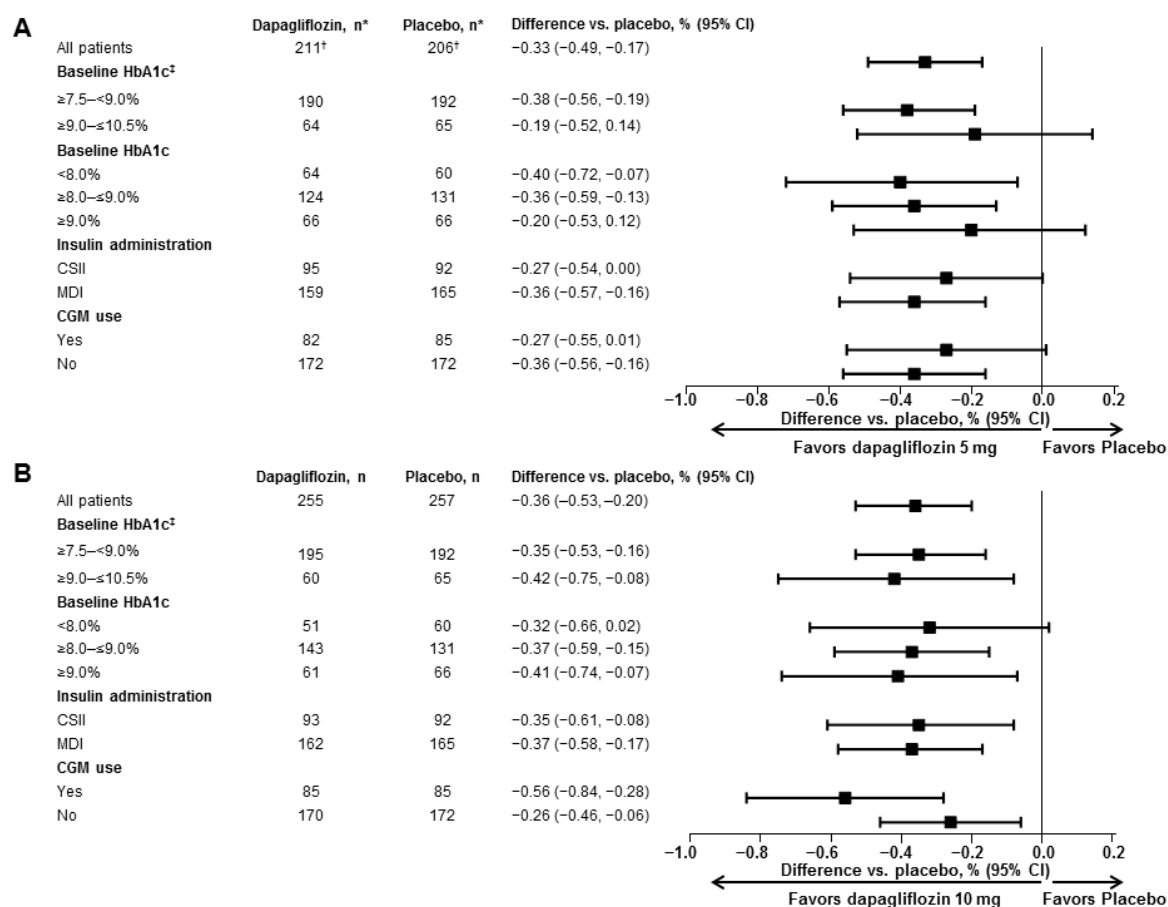

\*n, number of patients in the full analysis set with a baseline and at least one post-baseline value; <sup>†</sup>n, number of patients in the full analysis set with a baseline and Week 52 value; <sup>‡</sup>Randomization stratification factor CGM, continuous glucose monitoring; CI, confidence interval; CSII, continuous subcutaneous insulin infusion; MDI, multiple daily injections.

## SUPPLEMENTARY DATA

**Supplementary Figure S3.** Placebo-corrected changes from baseline in body weight with (A) dapagliflozin 5 mg and (B) dapagliflozin 10 mg; stratified by baseline HbA1c and BMI (full analysis set)

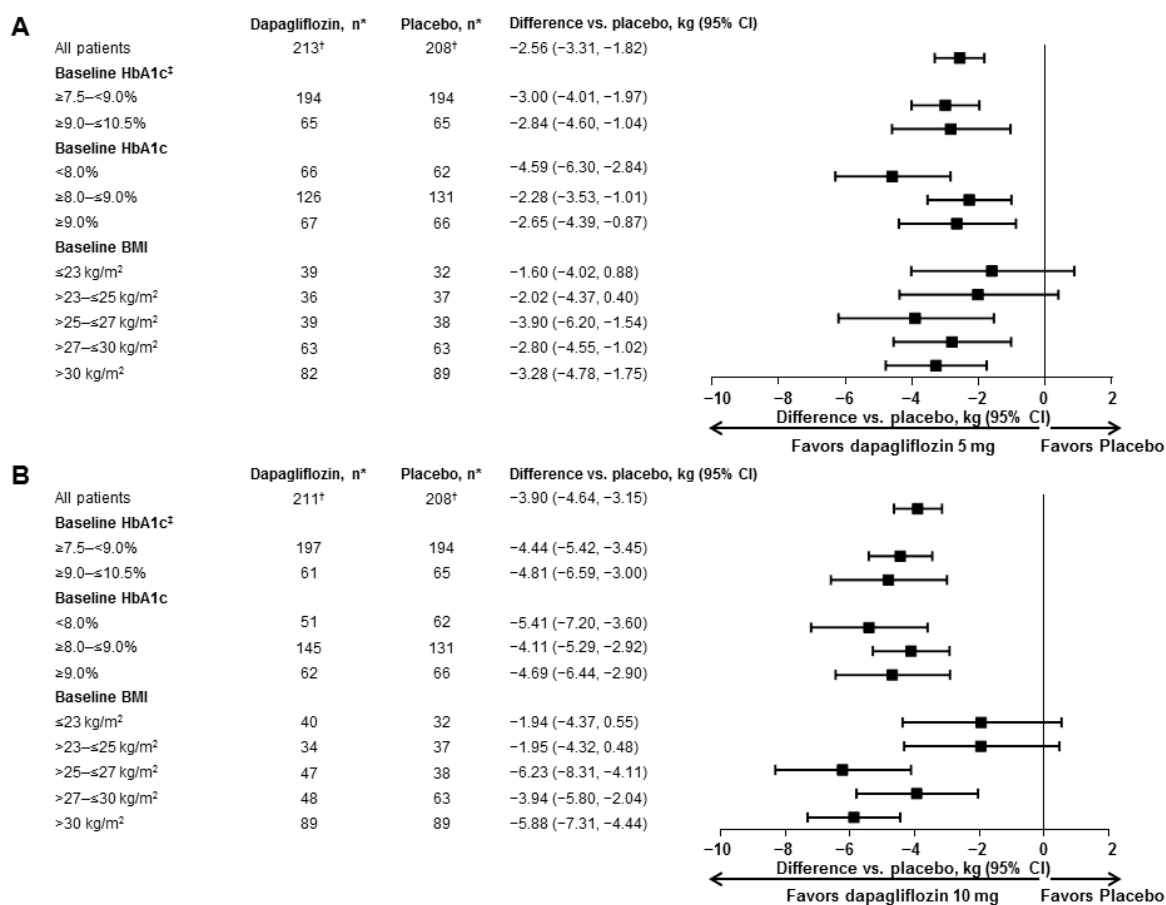

\*n, number of patients in the full analysis set with a baseline and at least one post-baseline value; <sup>†</sup>n, number of patients in the full analysis set with a baseline and Week 52 value; <sup>‡</sup>Randomization stratification factor BMI, body mass index; CI, confidence interval.

SUPPLEMENTARY DATA

Supplementary Figure S4. Kaplan-Meier plot of time to first definite DKA over the 52 weeks of study (Safety analysis set)

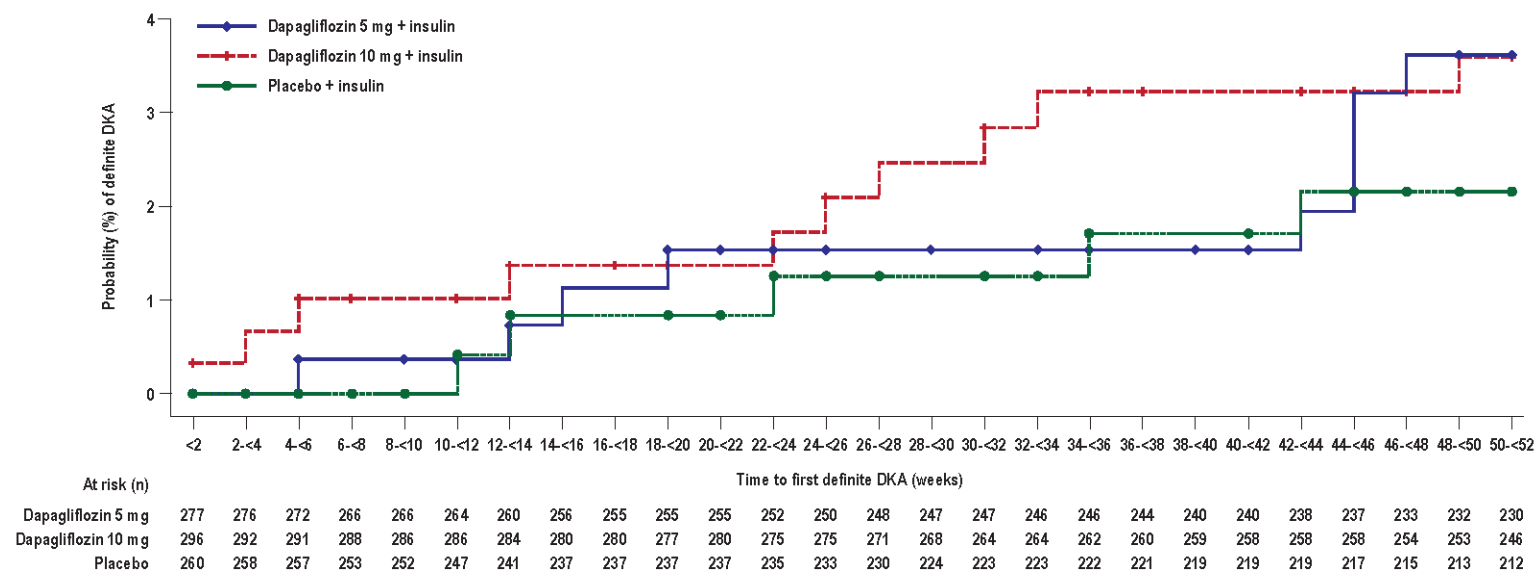

Symbols represent censored observations
